# Supplementary material for: Occlusal Enamel Complexity in Middle Miocene to Holocene Equids (Equidae: Perissodactyla) of North America
Source: PLoS One. 2014 Feb 27;9(2):e90184. doi: 10.1371/journal.pone.0090184 (PMC3937353; doi:10.1371/journal.pone.0090184)
Supplement: Table S1 — Raw OEI data for statistical analysis. (XLSX) [file pone.0090184.s001.xlsx]

## Sheet: Sheet1
Supplemental Table 1: Raw OEI data for statistical analysis
Specimen #	Subfamily	Tribe	Genus	Species	Element	Formation	Member	State	Region	Epoch	NALMA	True Area (cm2)	Enamel Length (cm)	OEI
AMNH F:AM 100077	Equinae	Equini	Onohippidium	galushai	P3	Big Sandy		Arizona	Great Basin	Miocene	Hemphillian	6.997	24.462	9.24775
AMNH F:AM 104769	Equinae	"Merychippini"	Merychippus	sp.	P3	Valentine	Burge	Nebraska	Great Plains	Miocene	Clarendonian	2.842	18.971	11.2533
AMNH F:AM 107596	Anchitheriinae	"Anchitheriini"	Hypohippus	sp.	P3	Valentine	Burge	Nebraska	Great Plains	Miocene	Clarendonian	6.41	19.674	7.77076
AMNH F:AM 108233	Equinae	Hipparionini	Cormohipparion	sphenodus	P3	Tesuque		New Mexico	Great Basin	Miocene	Barstovian	5.315	23.296	10.1048
AMNH F:AM 109883	Equinae	Hipparionini	"Hipparion"	sp.	P3	San Jacinto		Texas	Great Plains	Miocene	Barstovian	3.411	18.36	9.94104
AMNH F:AM 110131	Equinae	Equini	Parapliohippus	carrizoensis	P3	Barstow		California	Great Basin	Miocene	Barstovian	2.561	16.218	10.1343
AMNH F:AM 110222	Equinae	Equini	Merychippus	sp.	P3	Barstow		California	Great Basin	Miocene	Barstovian	5.547	23.636	10.0356
AMNH F:AM 110234	Equinae	Equini	Merychippus	sp.	P3	Barstow		California	Great Basin	Miocene	Barstovian	3.169	17.18	9.65077
AMNH F:AM 110343	Anchitheriinae	"Anchitheriini"	Hypohippus	equinus	P3	Olcott		Nebraska	Great Plains	Miocene	Barstovian	4.804	17.822	8.13121
AMNH F:AM 111728	Equinae	Equini	Protohippus	supremus	P3	Clarendon		Texas	Great Plains	Miocene	Clarendonian	6.421	24.598	9.7073
AMNH F:AM 114169	Equinae	Equini	Protohippus	supremus	P3	Clarendon		Texas	Great Plains	Miocene	Clarendonian	6.218	23.545	9.4422
AMNH F:AM 116143	Equinae	Equini	Equus	sp.	P3	Itchetucknee River		Florida	Gulf Coast	Pleistocene	Irv/Rancho	5.162	22.999	10.1228
AMNH F:AM 116148	Equinae	Equini	Equus	sp.	M2	Indio Hills		California	Great Basin	Pleistocene	Irv/Rancho	5.962	22.424	9.18369
AMNH F:AM 116150	Equinae	Equini	Equus	sp.	M2			Mexico	Gulf Coast	Pleistocene	Irv/Rancho	7.347	20.957	7.73168
AMNH F:AM 116156	Equinae	Equini	Equus	simplicidens	P3			Texas	Great Plains	Pleistocene	Irv/Rancho	7.392	23.748	8.73466
AMNH F:AM 116161	Equinae	Equini	Equus	scotti	P3	Las Cruces		New Mexico	Great Basin	Pleistocene	Irv/Rancho	8.871	25.924	8.70394
AMNH F:AM 116164	Equinae	Equini	Dinohippus	interpolatus	P3	Ogallala		Texas	Great Plains	Miocene	Hemphillian	8.395	25.486	8.79612
AMNH F:AM 116179	Equinae	Equini	Equus	scotti	P3			New Mexico	Great Basin	Pleistocene	Irv/Rancho	9.934	30.75	9.75625
AMNH F:AM 116194	Equinae	Equini	Dinohippus	leidyanus	P3	Ogallala		Oklahoma	Great Plains	Miocene	Hemphillian	4.572	22.46	10.504
AMNH F:AM 116792	Equinae	Equini	Dinohippus	leidyanus	P3	Ogallala		Oklahoma	Great Plains	Miocene	Hemphillian	7.816	29.622	10.5955
AMNH F:AM 116868	Equinae	Hipparionini	Pseudhipparion	retrusum	P3	Valentine		Nebraska	Great Plains	Miocene	Barstovian	2.653	17.784	10.9184
AMNH F:AM 117045	Equinae	Hipparionini	Nannippus	sp.	P3	Ash Hollow	Merrit Dam	Nebraska	Great Plains	Miocene	Clarendonian	2.9	20.879	12.2606
AMNH F:AM 118223	Equinae	Equini	Calippus	placidus	P3	Ogallala		Texas	Great Plains	Miocene	Clarendonian	2.33	13.004	8.5192
AMNH F:AM 125218	Equinae	Equini	Calippus	martini	P3	Ash Hollow		South Dakota	Great Plains	Miocene	Clarendonian	4.18	19.063	9.32402
AMNH F:AM 125488	Equinae	Equini	Calippus	martini	P3	Ogallala		Texas	Great Plains	Miocene	Clarendonian	6.066	22.353	9.07579
AMNH F:AM 125995	Equinae	"Merychippini"	Merychippus	calamarius	P3	Pawnee Creek		Colorado	Great Plains	Miocene	Barstovian	4.191	21.181	10.3464
AMNH F:AM 126899	Equinae	"Merychippini"	Merychippus	sp.	P3	Valentine	Devils Gulch	Nebraska	Great Plains	Miocene	Barstovian	3.516	19.557	10.4298
AMNH F:AM 127207	Equinae	Hipparionini	Protohippus	sp.	P3	Sheep Creek		Nebraska	Great Plains	Miocene	Hemphillian	1.799	11.825	8.81628
AMNH F:AM 127263	Equinae	Equini	Scaphohippus	sumani	P3	Barstow		California	Great Basin	Miocene	Barstovian	4.39	17.063	8.14373
AMNH F:AM 127569	Equinae	Hipparionini	Pseudhipparion	sp.	P3	Ogallala		Texas	Great Plains	Miocene	Clarendonian	2.532	15.318	9.62654
AMNH F:AM 127992	Equinae	"Merychippini"	Merychippus	sp.	P3	Pawnee Creek		Colorado	Great Plains	Miocene	Clarendonian	3.262	17.418	9.64398
AMNH F:AM 128091	Equinae	Equini	Astrohippus	ansae	P3	Ogallala		Oklahoma	Great Plains	Miocene	Hemphillian	4.536	17.755	8.33651
AMNH F:AM 128092	Equinae	Equini	Astrohippus	ansae	P3	Ogallala		Oklahoma	Great Plains	Miocene	Hemphillian	4.139	18.327	9.00832
AMNH F:AM 128154	Equinae	"Merychippini"	Merychippus	calamarius	P3	Tesuque		New Mexico	Great Basin	Miocene	Barstovian	4.3	23.183	11.1798
AMNH F:AM 128270	Equinae	Equini	Dinohippus	leidyanus	P3	Ogallala		Oklahoma	Great Plains	Miocene	Hemphillian	5.791	20.689	8.59731
AMNH F:AM 128444	Equinae	Equini	Dinohippus	leidyanus	P3	Ogallala		Oklahoma	Great Plains	Miocene	Hemphillian	5.175	17.909	7.87256
AMNH F:AM 142515	Equinae	Equini	Merychippus	n. sp.	P3	Olcott		Nebraska	Great Plains	Miocene	Clarendonian	3.044	16.464	9.43655
AMNH F:AM 143268	Equinae	Hipparionini	Neohipparion	affine	P3	Ogallala		Texas	Great Plains	Miocene	Clarendonian	5.123	22.159	9.79012
AMNH F:AM 143273	Equinae	"Merychippini"	Merychippus	sp.	P3	Tesuque		New Mexico	Great Basin	Miocene	Barstovian	5.73	26.763	11.1804
AMNH F:AM 14396	Equinae	Equini	Equus	occidentalis	P3	Rancho La Brea Asphalt		California	California	Pleistocene	Irv/Rancho	8.263	28.303	9.84609
AMNH F:AM 20077	Equinae	Equini	Equus	simplicidens	P3	Blanco		Texas	Great Plains	Pliocene	Blancan	11.899	28.732	8.32934
AMNH F:AM 21085	Anchitheriinae	"Anchitheriini"	Megahippus	sp.	P3	Barstow		California	Great Basin	Miocene	Barstovian	6.117	18.358	7.4226
AMNH F:AM 30702	Equinae	Equini	Equus	sp.	P3	Fairbanks		Alaska	Polar	Pleistocene	Irv/Rancho	7.48	28.443	10.3998
AMNH F:AM 30703	Equinae	Equini	Equus	sp.	P3	Fairbanks		Alaska	Polar	Pleistocene	Irv/Rancho	6.128	25.975	10.4929
AMNH F:AM 42810	Equinae	Equini	Equus	sp.	P3	Papago Spring Cave		Arizona	Great Basin	Pleistocene	Irv/Rancho	5.789	25.17	10.4612
AMNH F:AM 42811	Equinae	Equini	Equus	sp.	P3	Papago Spring Cave		Arizona	Great Basin	Pleistocene	Irv/Rancho	6.068	22.448	9.11286
AMNH F:AM 60061	Equinae	Equini	Equus	sp.	P3	Fairbanks Creek		Alaska	Polar	Pleistocene	Irv/Rancho	6.62	23.243	9.03365
AMNH F:AM 60062	Equinae	Equini	Equus	sp.	P3	Fairbanks Creek		Alaska	Polar	Pleistocene	Irv/Rancho	6.638	26.301	10.2083
AMNH F:AM 60066	Equinae	Equini	Equus	sp.	P3	Fairbanks Creek		Alaska	Polar	Pleistocene	Irv/Rancho	8.271	31.574	10.9787
AMNH F:AM 60300	Equinae	Equini	Merychippus	n. sp.	P3	Ash Hollow		South Dakota	Great Plains	Miocene	Clarendonian	3.283	17.991	9.92933
AMNH F:AM 60327	Equinae	Equini	Merychippus	n. sp.	P3	Clarendon		Texas	Great Plains	Miocene	Clarendonian	2.142	15.248	10.4185
AMNH F:AM 60420	Equinae	Equini	Calippus	regulus	P3	Ogallala		Texas	Great Plains	Miocene	Clarendonian	2.14	13.069	8.93378
AMNH F:AM 60500	Anchitheriinae	"Anchitheriini"	Hypohippus	n. sp.	P3	Ash Hollow		Nebraska	Great Plains	Miocene	Clarendonian	11.457	26.081	7.70529
AMNH F:AM 60561	Anchitheriinae	"Anchitheriini"	Hypohippus	sp.	P3	Valentine	Burge	Nebraska	Great Plains	Miocene	Clarendonian	6.406	18.565	7.33502
AMNH F:AM 60618	Anchitheriinae	"Anchitheriini"	Hypohippus	sp.	P3	Olcott		Nebraska	Great Plains	Miocene	Barstovian	5.28	18.249	7.94186
AMNH F:AM 60627	Anchitheriinae	"Anchitheriini"	Hypohippus	sp.	P3			Texas	Great Plains			3.389	15.931	8.65381
AMNH F:AM 60700	Anchitheriinae	"Anchitheriini"	Megahippus	matthewi	P3	Valentine	Burge	Nebraska	Great Plains	Miocene	Clarendonian	7.699	22.95	8.27114
AMNH F:AM 60720	Anchitheriinae	"Anchitheriini"	Megahippus	sp.	P3	Pawnee Creek		Colorado	Great Plains	Miocene	Barstovian	4.452	18.377	8.70958
AMNH F:AM 60878	Equinae	Equini	Pliohippus	pernix	P3	Clarendon		Texas	Great Plains	Miocene	Clarendonian	6.859	27.391	10.4587
AMNH F:AM 60880	Equinae	Equini	Pliohippus	sp.	P3	Clarendon		Texas	Great Plains	Miocene	Clarendonian	5.003	24.383	10.9011
AMNH F:AM 60904	Equinae	Equini	Pliohippus	sp.	P3	Clarendon		Texas	Great Plains	Miocene	Clarendonian	7.996	25.258	8.93228
AMNH F:AM 60905	Equinae	Equini	Pliohippus	sp.	P3	Tesuque		New Mexico	Great Basin	Miocene	Barstovian	5.061	21.399	9.51208
AMNH F:AM 69500	Equinae	"Merychippini"	Merychippus	coloradense	P3	Tesuque	Chamael Rito	New Mexico	Great Basin	Miocene	Clarendonian	4.275	21.225	10.2655
AMNH F:AM 69503	Equinae	"Merychippini"	Merychippus	coloradense	P3	Sante Fe		New Mexico	Great Basin	Miocene	Clarendonian	5.14	21.828	9.62792
AMNH F:AM 69506	Equinae	"Merychippini"	Merychippus	coloradense	P3	Ogallala		Colorado	Great Plains	Miocene	Barstovian	2.872	14.885	8.78328
AMNH F:AM 69550	Equinae	"Merychippini"	Merychippus	sp.	P3			Texas	Great Plains			3.32	17.118	9.39472
AMNH F:AM 69560	Equinae	Equini	Pliohippus	sp.	P3	Olcott		Nebraska	Great Plains	Miocene	Barstovian	3.307	19.032	10.4657
AMNH F:AM 69604	Equinae	Hipparionini	Merychippus	n. sp.	P3	Ash Hollow		Nebraska	Great Plains	Miocene	Clarendonian	3.505	17.432	9.31115
AMNH F:AM 70003	Equinae	Hipparionini	Pseudhipparion	retrusum	P3	Valentine	Burge	Nebraska	Great Plains	Miocene	Clarendonian	3.164	16.09	9.04561
AMNH F:AM 70112	Equinae	Hipparionini	Pseudhipparion	skinneri	P3							1.954	12.615	9.02454
AMNH F:AM 70439	Equinae	Hipparionini	Pseudhipparion	sp.	P3	Ogallala		Texas	Great Plains	Miocene	Clarendonian	2.653	17.434	10.7036
AMNH F:AM 71369	Equinae	Equini	Pliohippus	sp.	P3	Flint Creek Beds		Montana	Great Plains	Miocene	Barstovian	4.372	22.146	10.5914
AMNH F:AM 71377	Equinae	Equini	Pliohippus	sp.	P3			Nevada	Great Basin	Miocene	Hemphillian	3.36	14.878	8.11661
AMNH F:AM 71405	Equinae	Equini	Equus	sp.	P3	Gold Hill		Alaska	Polar	Pleistocene	Irv/Rancho	6.374	25.384	10.0544
AMNH F:AM 71463	Equinae	Equini	Equus	sp.	P3	Dome Creek		Alaska	Polar	Pleistocene	Irv/Rancho	5.265	23.796	10.3706
AMNH F:AM 71502	Anchitheriinae	"Anchitheriini"	Desmatippus	integer	P3	Olcott		Nebraska	Great Plains	Miocene	Barstovian	3.735	15.75	8.14958
AMNH F:AM 71508	Anchitheriinae	"Anchitheriini"	Desmatippus	sp.	P3	Olcott		Nebraska	Great Plains	Miocene	Barstovian	1.854	12.793	9.39545
AMNH F:AM 71592	Anchitheriinae	"Anchitheriini"	Desmatippus	sp.	P3	Pawnee Creek		Colorado	Great Plains	Miocene	Barstovian	1.0094	9.528	9.48353
AMNH F:AM 71887	Equinae	Hipparionini	Hipparion	forcei	P3	Snake Creek		Nebraska	Great Plains	Miocene	Clarendonian	4.636	25.012	11.6165
AMNH F:AM 71891	Equinae	Hipparionini	"Cormohipparion"	quinni	P3							4.587	19.43	9.07211
AMNH F:AM 73940	Equinae	Hipparionini	Cormohipparion	goorisi	P3			Texas	Great Plains			3.8	20.291	10.4091
AMNH F:AM 73950	Equinae	Hipparionini	Hipparion	shirleyi	P3							2.482	18.552	11.7758
AMNH F:AM 73951	Equinae	Hipparionini	Hipparion	shirleyi	P3	San Jacinto		Texas	Great Plains	Miocene	Barstovian	2.192	15.083	10.1875
AMNH F:AM 74230	Equinae	Equini	Astrohippus	ansae	P3	Chamita		New Mexico	Great Basin	Miocene	Hemphillian	5.624	21.297	8.9804
AMNH F:AM 74273	Equinae	Equini	Astrohippus	stockii	P3	Ogallala		Texas	Great Plains	Miocene	Hemphillian	3.866	16.185	8.23155
AMNH F:AM 74274	Equinae	Equini	Astrohippus	stockii	P3	Ogallala		Texas	Great Plains	Miocene	Hemphillian	2.778	13.342	8.00488
AMNH F:AM 74404	Equinae	Hipparionini	Nannippus	lenticulare	P3			Texas	Great Plains	Miocene	Clarendonian	3.271	15.811	8.74217
AMNH F:AM 74416	Equinae	Hipparionini	Nannippus	lenticulare	P3			Texas	Great Plains	Miocene	Clarendonian	3.662	18.575	9.70666
AMNH F:AM 8105	Equinae	"Merychippini"	Merychippus	sp.	P3	Deep River		Montana	Great Plains	Miocene	Barstovian	4.238	18.49	8.98166
AMNH F:AM 87201	Equinae	Equini	Dinohippus	leidyanus	P2	Ogallala		Kansas	Great Plains	Miocene	Hemphillian	6.086	17.473	7.08274
AMNH F:AM 87201	Equinae	Equini	Dinohippus	leidyanus	P3	Ogallala		Kansas	Great Plains	Miocene	Hemphillian	5.362	19.288	8.32959
AMNH F:AM 87201	Equinae	Equini	Dinohippus	leidyanus	P4	Ogallala		Kansas	Great Plains	Miocene	Hemphillian	4.917	18.999	8.56802
AMNH F:AM 87201	Equinae	Equini	Dinohippus	leidyanus	M1	Ogallala		Kansas	Great Plains	Miocene	Hemphillian	4.341	17.902	8.59225
AMNH F:AM 87201	Equinae	Equini	Dinohippus	leidyanus	M2	Ogallala		Kansas	Great Plains	Miocene	Hemphillian	4.231	18.117	8.80775
AMNH F:AM 87201	Equinae	Equini	Dinohippus	leidyanus	M3	Ogallala		Kansas	Great Plains	Miocene	Hemphillian	4.094	16.32	8.06578
AMNH F:AM 87301	Equinae	Equini	Scaphohippus	intermontanus	P3	Olcott		Nebraska	Great Plains	Miocene	Barstovian	3.458	17.272	9.28817
AMNH F:AM 87429	Equinae	Equini	Equus	simplicidens	P3	Keim		Nebraska	Great Plains	Pliocene	Blancan	7.375	25.25	9.2978
AMNH F:AM 92470	Equinae	Equini	Equus	fraternus	P4			Florida	Gulf Coast	Pleistocene	Irv/Rancho	4.43	18.242	8.66704
AMNH F:AM 95588	Equinae	Equini	Equus	fraternus	P3	Pool Creek		Florida	Gulf Coast	Pleistocene	Irv/Rancho	6.038	30.289	12.3265
AMNH F:AM 99247	Equinae	Equini	Equus	simplicidens	P3			Florida	Gulf Coast	Pliocene	Blancan	5.438	22.284	9.55594
AMNH FM 10584	Equinae	Hipparionini	Nannippus	lenticulare	P3	Clarendon		Texas	Great Plains	Miocene	Clarendonian	3.963	19.236	9.66279
AMNH FM 10607	Equinae	Equini	Equus	scotti	P3	Rock Creek Beds		Texas	Great Plains	Pleistocene	Irv/Rancho	8.239	26.481	9.22565
AMNH FM 10612	Equinae	Equini	Equus	scotti	P3	Rock Creek		Texas	Great Plains	Pleistocene	Irv/Rancho	7.566	22.859	8.31044
AMNH FM 10628	Equinae	Equini	Equus	scotti	P3	Rock Creek		Texas	Great Plains	Pleistocene	Irv/Rancho	9.787	35.83	11.4531
AMNH FM 10865	Equinae	Hipparionini	Neohipparion	sp.	P3			South Dakota	Great Plains			5.769	25.951	10.8045
AMNH FM 109855	Equinae	"Merychippini"	Merychippus	sp.	P3	Tesuque		New Mexico	Great Basin	Miocene	Barstovian	4.364	17.045	8.15933
AMNH FM 127671	Equinae	Equini	Equus	sp.				Honduras	Gulf Coast	Pleistocene	Irv/Rancho	5.968	26.764	10.9556
AMNH FM 13714	Equinae	Equini	Equus	sp.		Phosphate Workings		South Carolina	Eastern US	Pleistocene	Irv/Rancho	6.036	31.946	13.0029
AMNH FM 13770	Anchitheriinae	"Anchitheriini"	Parahippus	nebrascensis	P3							6.972	19.189	7.26731
AMNH FM 140736	Equinae	Equini	Scaphohippus	sp.	P3	Tesuque		New Mexico	Great Basin	Miocene	Barstovian	4.165	18.888	9.25504
AMNH FM 14180	Equinae	"Merychippini"	Merychippus	sp.	P3							3.491	16.08	8.60619
AMNH FM 142647	Equinae	Equini	Scaphohippus	sp.	P3	Tesuque		New Mexico	Great Basin	Miocene	Barstovian	4.249	21.476	10.4186
AMNH FM 14296	Equinae	Equini	Equus	complicatus	P2	Gravel		Mississippi	Gulf Coast	Pleistocene	Irv/Rancho	9.368	34.475	11.2637
AMNH FM 143258	Equinae	"Merychippini"	Merychippus	sp.	P3	Barstow		California	Great Basin	Miocene	Barstovian	4.612	17.28	8.04635
AMNH FM 15549	Equinae	Equini	Equus	sp.	M2			Mexico	Gulf Coast	Pleistocene	Irv/Rancho	4.671	23.741	10.9848
AMNH FM 17224	Equinae	Equini	Dinohippus	leidyanus	P3							6.648	24.88	9.6495
AMNH FM 18297	Equinae	"Merychippini"	Merychippus	insignis	P3	Olcott		Nebraska	Great Plains	Miocene	Barstovian	2.649	14.096	8.66074
AMNH FM 18299	Equinae	"Merychippini"	Merychippus	insignis	P3	Olcott		Nebraska	Great Plains	Miocene	Barstovian	3.109	16.651	9.44343
AMNH FM 18655	Equinae	Equini	Equus	simplicidens	P3			Arizona	Great Basin	Pliocene	Blancan	10.924	30.577	9.25133
AMNH FM 18972	Equinae	Equini	Dinohippus	leidyanus	P3	Snake Creek		Nebraska	Great Plains	Miocene	Hemphillian	4.626	18.603	8.64928
AMNH FM 22733	Equinae	Equini	Equus	intermedius	P3	Avery Island		Louisiana	Gulf Coast	Pleistocene	Irv/Rancho	6.657	27.172	10.5313
AMNH FM 27834	Equinae	Equini	Equus	complicatus		Avery Island		Louisiana	Gulf Coast	Pleistocene	Irv/Rancho	7.077	31.232	11.7402
AMNH FM 32551	Equinae	Equini	Equus	simplicidens	P3	Glenns Ferry		Idaho	Columbia Plateau	Pliocene	Blancan	9.144	30.447	10.0688
AMNH FM 39407	Equinae	Equini	Equus	complicatus	P3			Missouri	Great Plains	Pleistocene	Irv/Rancho	6.081	27.783	11.2666
AMNH FM 55595	Equinae	Equini	Equus	fraternus		Phosphate Workings		South Carolina	Eastern US	Pleistocene	Irv/Rancho	5.761	25.552	10.6457
AMNH FM 8175	Equinae	"Merychippini"	Acritohippus	sp.	P3	Mascall		Oregon	Columbia Plateau	Miocene	Barstovian	3.176	17.755	9.96278
AMNH FM 8347	Equinae	"Merychippini"	Merychippus	republicanus	P3			Nebraska	Great Plains	Miocene	Clarendonian	4.007	21.534	10.7576
AMNH FM 9201	Equinae	Equini	Equus	sp.		Phosphate Workings		South Carolina	Eastern US	Pleistocene	Irv/Rancho	4.809	24.023	10.9547
AMNH FM 9203	Equinae	Equini	Equus	fraternus	P3	Phosphate Workings		South Carolina	Eastern US	Pleistocene	Irv/Rancho	5.461	28.599	12.2381
AMNH FM 9395	Anchitheriinae	"Anchitheriini"	Hypohippus	osborni	P3	Pawnee Buttes		Colorado	Great Plains	Pleistocene	Barstovian	4.835	15.287	6.95223
AMNH FM 9400	Equinae	Equini	Merychippus	n. sp.	P3	Pawnee Creek		Colorado	Great Plains	Miocene	Clarendonian	2.7	14.844	9.03377
AMNH FM 9820	Equinae	Equini	Protohippus	simus	P3			South Dakota	Great Plains			5.233	19.251	8.41546
AMNH FM 9967	Equinae	Equini	Equus	sp.		Cave		Pennsylvania	Eastern US	Pleistocene	Irv/Rancho	5.201	23.84	10.4535
CIT 363	Equinae	Hipparionini	Merychippus	seversus	P2	Mascall		Oregon	Columbia Plateau	Miocene	Barstovian	3.648	16.505	8.64148
CIT 363	Equinae	Hipparionini	Merychippus	seversus	P3	Mascall		Oregon	Columbia Plateau	Miocene	Barstovian	4.008	15.656	7.82018
CIT 363	Equinae	Hipparionini	Merychippus	seversus	P4	Mascall		Oregon	Columbia Plateau	Miocene	Barstovian	4.584	16.729	7.81354
CIT 363	Equinae	Hipparionini	Merychippus	seversus	M1	Mascall		Oregon	Columbia Plateau	Miocene	Barstovian	4.638	17.339	8.05116
CIT 363	Equinae	Hipparionini	Merychippus	seversus	M2	Mascall		Oregon	Columbia Plateau	Miocene	Barstovian	4.289	18.302	8.83732
CIT 363	Equinae	Hipparionini	Merychippus	seversus	M3	Mascall		Oregon	Columbia Plateau	Miocene	Barstovian	3.726	17.244	8.9334
JODA 10014	Equinae	Hipparionini	Hipparion	sp.		Juntura		Oregon	Columbia Plateau	Miocene	Clarendonian	4.2	23.086	11.2648
JODA 10703	Anchitheriinae	"Anchitheriini"	Parahippus	sp.		Mascall		Oregon	Columbia Plateau	Miocene	Barstovian	2.196	13.031	8.7935
JODA 1079, A	Equinae	Hipparionini	Merychippus	seversus	P2	Simtustus		Oregon	Columbia Plateau	Miocene	Barstovian	2.499	14.944	9.45331
JODA 1079, A	Equinae	Hipparionini	Merychippus	seversus	P3	Simtustus		Oregon	Columbia Plateau	Miocene	Barstovian	2.736	16.116	9.74315
JODA 1079, A	Equinae	Hipparionini	Merychippus	seversus	P4	Simtustus		Oregon	Columbia Plateau	Miocene	Barstovian	2.647	16.973	10.4323
JODA 1079, A	Equinae	Hipparionini	Merychippus	seversus	M1	Simtustus		Oregon	Columbia Plateau	Miocene	Barstovian	2.301	15.083	9.94327
JODA 1079, A	Equinae	Hipparionini	Merychippus	seversus	M2	Simtustus		Oregon	Columbia Plateau	Miocene	Barstovian	2.219	15.445	10.3683
JODA 1316	Equinae	Hipparionini	Merychippus	seversus	P2	Mascall		Oregon	Columbia Plateau	Miocene	Barstovian	2.478	14.645	9.30334
JODA 1316	Equinae	Hipparionini	Merychippus	seversus	P3	Mascall		Oregon	Columbia Plateau	Miocene	Barstovian	2.262	16.149	10.7374
JODA 1316	Equinae	Hipparionini	Merychippus	seversus	P4	Mascall		Oregon	Columbia Plateau	Miocene	Barstovian	2.575	16.452	10.2525
JODA 1316	Equinae	Hipparionini	Merychippus	seversus	M1	Mascall		Oregon	Columbia Plateau	Miocene	Barstovian	2.263	15.504	10.3063
JODA 1316	Equinae	Hipparionini	Merychippus	seversus	M2	Mascall		Oregon	Columbia Plateau	Miocene	Barstovian	2.419	15.807	10.1632
JODA 1316	Equinae	Hipparionini	Merychippus	seversus	M3	Mascall		Oregon	Columbia Plateau	Miocene	Barstovian	1.716	13.406	10.2339
JODA 1318	Equinae	"Merychippini"	Merychippus	sp.	P3	Mascall		Oregon	Columbia Plateau	Miocene	Barstovian	2.463	14.888	9.48646
JODA 1318	Equinae	"Merychippini"	Merychippus	sp.	P4	Mascall		Oregon	Columbia Plateau	Miocene	Barstovian	2.418	15.994	10.2856
JODA 1318	Equinae	"Merychippini"	Merychippus	sp.	M1	Mascall		Oregon	Columbia Plateau	Miocene	Barstovian	2.206	15.565	10.4796
JODA 1318	Equinae	"Merychippini"	Merychippus	sp.	M2	Mascall		Oregon	Columbia Plateau	Miocene	Barstovian	2.23	15.632	10.468
JODA 1318	Equinae	"Merychippini"	Merychippus	sp.	M3	Mascall		Oregon	Columbia Plateau	Miocene	Barstovian	1.505	12.838	10.4648
JODA 1332	Anchitheriinae	"Anchitheriini"	Archaeohippus	sp.	P3	Mascall		Oregon	Columbia Plateau	Miocene	Barstovian	0.965	7.41	7.54318
JODA 1332	Anchitheriinae	"Anchitheriini"	Archaeohippus	sp.	P4	Mascall		Oregon	Columbia Plateau	Miocene	Barstovian	0.94	7.367	7.59848
JODA 1332	Anchitheriinae	"Anchitheriini"	Archaeohippus	sp.	M1	Mascall		Oregon	Columbia Plateau	Miocene	Barstovian	0.92	9.343	9.74075
JODA 1332	Anchitheriinae	"Anchitheriini"	Archaeohippus	sp.	M2	Mascall		Oregon	Columbia Plateau	Miocene	Barstovian	0.939	8.827	9.1092
JODA 1332	Anchitheriinae	"Anchitheriini"	Archaeohippus	sp.	M3	Mascall		Oregon	Columbia Plateau	Miocene	Barstovian	0.391	5.176	8.27763
JODA 1333	Equinae	Equini	Pliohippus	sp.	P2	Rattlesnake		Oregon	Columbia Plateau	Miocene	Hemphillian	4.674	19.134	8.85037
JODA 1333	Equinae	Equini	Pliohippus	sp.	P3	Rattlesnake		Oregon	Columbia Plateau	Miocene	Hemphillian	4.908	20.646	9.31931
JODA 1333	Equinae	Equini	Pliohippus	sp.	P4	Rattlesnake		Oregon	Columbia Plateau	Miocene	Hemphillian	4.658	21.212	9.82838
JODA 1333	Equinae	Equini	Pliohippus	sp.	M1	Rattlesnake		Oregon	Columbia Plateau	Miocene	Hemphillian	4.534	19.822	9.30908
JODA 1333	Equinae	Equini	Pliohippus	sp.	M2	Rattlesnake		Oregon	Columbia Plateau	Miocene	Hemphillian	4.232	20.688	10.0565
JODA 1333	Equinae	Equini	Pliohippus	sp.	M3	Rattlesnake		Oregon	Columbia Plateau	Miocene	Hemphillian	2.843	17.237	10.2229
JODA 1979	Equinae	"Merychippini"	Merychippus	sp.		Mascall		Oregon	Columbia Plateau	Miocene	Barstovian	2.538	17.451	10.954
JODA 1980	Equinae	"Merychippini"	Merychippus	sp.		Mascall		Oregon	Columbia Plateau	Miocene	Barstovian	2.337	15.78	10.3223
JODA 1981	Equinae	"Merychippini"	Merychippus	sp.		Mascall		Oregon	Columbia Plateau	Miocene	Barstovian	2.336	15.001	9.81485
JODA 1982	Equinae	"Merychippini"	Merychippus	sp.		Mascall		Oregon	Columbia Plateau	Miocene	Barstovian	2.425	16.656	10.6958
JODA 1987	Equinae	"Merychippini"	Merychippus	sp.		Mascall		Oregon	Columbia Plateau	Miocene	Barstovian	2.292	16.437	10.8571
JODA 1988	Equinae	"Merychippini"	Merychippus	sp.		Mascall		Oregon	Columbia Plateau	Miocene	Barstovian	2.689	20.008	12.2014
JODA 1990	Equinae	"Merychippini"	Merychippus	sp.		Mascall		Oregon	Columbia Plateau	Miocene	Barstovian	2.689	20.008	12.2014
JODA 1997	Equinae	"Merychippini"	Merychippus	sp.	P2	Mascall		Oregon	Columbia Plateau	Miocene	Barstovian	2.072	13.926	9.67457
JODA 1998	Equinae	"Merychippini"	Merychippus	sp.	P2	Mascall		Oregon	Columbia Plateau	Miocene	Barstovian	2.802	16.977	10.1421
JODA 2001	Equinae	Hipparionini	Hipparion	sp.		Rattlesnake		Oregon	Columbia Plateau	Miocene	Hemphillian	3.19	19.583	10.9644
JODA 2066	Equinae	Hipparionini	Neohipparion	sp.		Rattlesnake		Oregon	Columbia Plateau	Miocene	Hemphillian	3.776	19.548	10.0597
JODA 2069	Equinae	Equini	Pliohippus	sp.		Rattlesnake		Oregon	Columbia Plateau	Miocene	Hemphillian	5.142	20.243	8.92707
JODA 2072	Equinae	Equini	Pliohippus	sp.	P2	Rattlesnake		Oregon	Columbia Plateau	Miocene	Hemphillian	3.937	17.621	8.88071
JODA 2402	Anchitheriinae	"Anchitheriini"	Parahippus	sp.		Mascall		Oregon	Columbia Plateau	Miocene	Barstovian	1.922	13.412	9.67424
JODA 2405	Anchitheriinae	"Anchitheriini"	Parahippus	sp.		Mascall		Oregon	Columbia Plateau	Miocene	Barstovian	2	12.789	9.04319
JODA 2406	Anchitheriinae	"Anchitheriini"	Parahippus	sp.		Mascall		Oregon	Columbia Plateau	Miocene	Barstovian	1.761	13.744	10.357
JODA 2407	Anchitheriinae	"Anchitheriini"	Parahippus	sp.		Mascall		Oregon	Columbia Plateau	Miocene	Barstovian	1.865	13.112	9.60129
JODA 2408	Anchitheriinae	"Anchitheriini"	Parahippus	sp.		Mascall		Oregon	Columbia Plateau	Miocene	Barstovian	1.79	11.697	8.74275
JODA 2409	Anchitheriinae	"Anchitheriini"	Parahippus	sp.		Mascall		Oregon	Columbia Plateau	Miocene	Barstovian	2.03	10.406	7.30358
JODA 2428			?			Mascall		Oregon	Columbia Plateau	Miocene	Barstovian	1.291	9.832	8.65324
JODA 2435	Anchitheriinae	"Anchitheriini"	Parahippus	sp.	P2	Mascall		Oregon	Columbia Plateau	Miocene	Barstovian	2.209	10.862	7.30823
JODA 2435	Anchitheriinae	"Anchitheriini"	Parahippus	sp.	P3	Mascall		Oregon	Columbia Plateau	Miocene	Barstovian	2.666	13.48	8.25581
JODA 2435	Anchitheriinae	"Anchitheriini"	Parahippus	sp.	P4	Mascall		Oregon	Columbia Plateau	Miocene	Barstovian	2.727	14.193	8.59472
JODA 2435	Anchitheriinae	"Anchitheriini"	Parahippus	sp.	M1	Mascall		Oregon	Columbia Plateau	Miocene	Barstovian	2.745	12.958	7.82108
JODA 2435	Anchitheriinae	"Anchitheriini"	Parahippus	sp.	M2	Mascall		Oregon	Columbia Plateau	Miocene	Barstovian	2.677	14.393	8.79685
JODA 2435	Anchitheriinae	"Anchitheriini"	Parahippus	sp.	M3	Mascall		Oregon	Columbia Plateau	Miocene	Barstovian	2.365	13.778	8.95923
JODA 2446	Equinae	"Merychippini"	Merychippus	sp.		Mascall		Oregon	Columbia Plateau	Miocene	Barstovian	2.846	19.043	11.288
JODA 2564	Equinae	Hipparionini	Cormohipparion	sp.		Rattlesnake		Oregon	Columbia Plateau	Miocene	Hemphillian	3.912	26.943	13.6222
JODA 293	Equinae	"Merychippini"	Merychippus	sp.		Mascall		Oregon	Columbia Plateau	Miocene	Barstovian	2.373	17.1	11.1006
JODA 294	Equinae	"Merychippini"	Merychippus	sp.		Mascall		Oregon	Columbia Plateau	Miocene	Barstovian	2.536	16.971	10.6569
JODA 561	Equinae	Hipparionini	Neohipparion	sp.		Rattlesnake		Oregon	Columbia Plateau	Miocene	Hemphillian	3.793	20.189	10.3663
MVZ 117884	Equinae	Equini	Equus	quagga	P2					Recent	Recent	6.291	24.088	9.60375
MVZ 117884	Equinae	Equini	Equus	quagga	P3					Recent	Recent	6.295	23.219	9.25434
MVZ 117884	Equinae	Equini	Equus	quagga	P4					Recent	Recent	6.455	22.964	9.03856
MVZ 117884	Equinae	Equini	Equus	quagga	M1					Recent	Recent	5.423	19.163	8.22894
MVZ 117884	Equinae	Equini	Equus	quagga	M2					Recent	Recent	4.9	18.833	8.50788
MVZ 117884	Equinae	Equini	Equus	quagga	M3					Recent	Recent	3.854	17.201	8.76189
MVZ 117885	Equinae	Equini	Equus	quagga	P2					Recent	Recent	5.643	19.015	8.00463
MVZ 117885	Equinae	Equini	Equus	quagga	P3					Recent	Recent	5.594	19.55	8.26581
MVZ 117885	Equinae	Equini	Equus	quagga	P4					Recent	Recent	5.09	19.4	8.5989
MVZ 117885	Equinae	Equini	Equus	quagga	M1					Recent	Recent	4.301	16.554	7.98212
MVZ 117885	Equinae	Equini	Equus	quagga	M2					Recent	Recent	4.262	16.617	8.04907
MVZ 117885	Equinae	Equini	Equus	quagga	M3					Recent	Recent	3.596	15.598	8.22544
MVZ 117887	Equinae	Equini	Equus	quagga	P2					Recent	Recent	5.685	21.42	8.98368
MVZ 117887	Equinae	Equini	Equus	quagga	P3					Recent	Recent	5.307	20.327	8.82366
MVZ 117887	Equinae	Equini	Equus	quagga	P4					Recent	Recent	5.375	21.128	9.11316
MVZ 117887	Equinae	Equini	Equus	quagga	M1					Recent	Recent	4.307	17.864	8.60778
MVZ 117887	Equinae	Equini	Equus	quagga	M2					Recent	Recent	3.859	18.425	9.37929
MVZ 117887	Equinae	Equini	Equus	quagga	M3					Recent	Recent	3.316	16.325	8.96491
MVZ 117888	Equinae	Equini	Equus	quagga	P2					Recent	Recent	5.636	21.309	8.97589
MVZ 117888	Equinae	Equini	Equus	quagga	P3					Recent	Recent	5.596	20.438	8.63972
MVZ 117888	Equinae	Equini	Equus	quagga	P4					Recent	Recent	5.523	20.081	8.54472
MVZ 117888	Equinae	Equini	Equus	quagga	M1					Recent	Recent	5.397	19.094	8.21903
MVZ 117888	Equinae	Equini	Equus	quagga	M2					Recent	Recent	4.818	18.611	8.47884
MVZ 117888	Equinae	Equini	Equus	quagga	M3					Recent	Recent	3.569	16.92	8.95627
MVZ 154358	Equinae	Equini	Equus	asinus	P2					Recent	Recent	4.735	16.469	7.56846
MVZ 154358	Equinae	Equini	Equus	asinus	P3					Recent	Recent	5.159	17.936	7.89665
MVZ 154358	Equinae	Equini	Equus	asinus	P4					Recent	Recent	5.287	18.543	8.06446
MVZ 154358	Equinae	Equini	Equus	asinus	M1					Recent	Recent	4.483	16.168	7.63611
MVZ 154358	Equinae	Equini	Equus	asinus	M2					Recent	Recent	4.373	16.386	7.8358
MVZ 154358	Equinae	Equini	Equus	asinus	M3					Recent	Recent	4.059	16.384	8.13224
MVZ 55150	Equinae	Equini	Equus	grevyi	P2					Recent	Recent	7.841	22.652	8.08948
MVZ 55150	Equinae	Equini	Equus	grevyi	P3					Recent	Recent	7.595	23.764	8.62295
MVZ 55150	Equinae	Equini	Equus	grevyi	P4					Recent	Recent	7.52	24.842	9.05895
MVZ 55150	Equinae	Equini	Equus	grevyi	M1					Recent	Recent	6.464	20.978	8.25113
MVZ 55150	Equinae	Equini	Equus	grevyi	M2					Recent	Recent	6.813	21.928	8.40098
MVZ 55150	Equinae	Equini	Equus	grevyi	M3					Recent	Recent	6.016	20.629	8.41055
SDSM 12195	Equinae	Equini	Equus	calobatus				South Dakota	Great Plains	Pleistocene	Irv/Rancho	9.914	34.932	11.0943
SDSM 22027	Equinae	Equini	Equus	simplicidens	P2	Savage Island? Ringold?		Washington	Columbia Plateau	Pliocene	Blancan	5.788	24.504	10.1853
SDSM 22032	Equinae	Equini	Equus	simplicidens		Savage Island? Ringold?		Washington	Columbia Plateau	Pliocene	Blancan	6.862	26.805	10.2327
SDSM 505	Equinae	"Merychippini"	Merychippus	c.f. sejunctus	P2	Lower Snake Creek		Nebraska	Great Plains	Miocene	Barstovian	2.699	12.496	7.60623
SDSM 505	Equinae	"Merychippini"	Merychippus	c.f. sejunctus	P3	Lower Snake Creek		Nebraska	Great Plains	Miocene	Barstovian	3.191	14.976	8.38364
SDSM 505	Equinae	"Merychippini"	Merychippus	c.f. sejunctus	P4	Lower Snake Creek		Nebraska	Great Plains	Miocene	Barstovian	3.244	15.285	8.48643
SDSM 505	Equinae	"Merychippini"	Merychippus	c.f. sejunctus	M1	Lower Snake Creek		Nebraska	Great Plains	Miocene	Barstovian	2.65	13.502	8.29421
SDSM 505	Equinae	"Merychippini"	Merychippus	c.f. sejunctus	M2	Lower Snake Creek		Nebraska	Great Plains	Miocene	Barstovian	2.877	15.653	9.22843
SDSM 505	Equinae	"Merychippini"	Merychippus	c.f. sejunctus	M3	Lower Snake Creek		Nebraska	Great Plains	Miocene	Barstovian	3.023	15.418	8.86766
SDSM 5057	Equinae	"Merychippini"	Merychippus	sp.		Lower Snake Creek		Nebraska	Great Plains	Miocene	Barstovian	2.939	14.295	8.33843
SDSM 5057	Equinae	"Merychippini"	Merychippus	sp.		Lower Snake Creek		Nebraska	Great Plains	Miocene	Barstovian	3.022	15.582	8.96347
SDSM 53217	Equinae	Hipparionini	Pseudhipparion	sp.		Ash Hollow		South Dakota	Great Plains	Miocene	Clarendonian	2.276	15.258	10.1137
SDSM 53217 F1	Equinae	Hipparionini	Pseudhipparion	sp.		Ash Hollow		South Dakota	Great Plains	Miocene	Clarendonian	2.343	15.36	10.0347
SDSM 53217-12	Equinae	Hipparionini	Cormohipparion	sp.		Ash Hollow		South Dakota	Great Plains	Miocene	Clarendonian	4.44	22.671	10.7592
SDSM 53217-17	Equinae	Hipparionini	Neohipparion	sp.		Ash Hollow		South Dakota	Great Plains	Miocene	Clarendonian	5.392	24.991	10.7624
SDSM 53217-3	Equinae	Hipparionini	Cormohipparion	sp.		Ash Hollow		South Dakota	Great Plains	Miocene	Clarendonian	5.465	28.41	12.1528
SDSM 53217-30	Equinae	Hipparionini	Cormohipparion	sp.		Ash Hollow		South Dakota	Great Plains	Miocene	Clarendonian	5.356	24.968	10.7886
SDSM 53217-31	Equinae	Hipparionini	Neohipparion	sp.		Ash Hollow		South Dakota	Great Plains	Miocene	Clarendonian	4.03	23.094	11.5039
SDSM 53217-34	Equinae	Hipparionini	Cormohipparion	sp.		Ash Hollow		South Dakota	Great Plains	Miocene	Clarendonian	4.147	25.026	12.2892
SDSM 53217-40	Equinae	Hipparionini	Cormohipparion	sp.		Ash Hollow		South Dakota	Great Plains	Miocene	Clarendonian	4.896	24.847	11.2293
SDSM 53217-5	Equinae	Equini	Pliohippus	sp.		Ash Hollow		South Dakota	Great Plains	Miocene	Clarendonian	3.349	16.655	9.10096
SDSM 53217-9	Equinae	Hipparionini	Neohipparion	sp.		Ash Hollow		South Dakota	Great Plains	Miocene	Clarendonian	4.804	23.828	10.8714
SDSM 53217-D	Equinae	Hipparionini	Neohipparion	sp.		Ash Hollow		South Dakota	Great Plains	Miocene	Clarendonian	4.402	25.061	11.9446
SDSM 53217-E	Equinae	Hipparionini	Neohipparion	sp.		Ash Hollow		South Dakota	Great Plains	Miocene	Clarendonian	5.193	23.909	10.4919
SDSM 53218 E	Equinae	Equini	Pliohippus	sp.		Ash Hollow		South Dakota	Great Plains	Miocene	Clarendonian	6.226	25.564	10.2453
SDSM 53218 K	Equinae	Equini	Calippus	sp.	P2	Ash Hollow		South Dakota	Great Plains	Miocene	Clarendonian	2.213	11.197	7.52681
SDSM 53219	Equinae	Hipparionini	Pseudhipparion	sp.		Ash Hollow		South Dakota	Great Plains	Miocene	Clarendonian	2.269	15.472	10.2714
SDSM 53219 AG	Equinae	Hipparionini	Pseudhipparion	sp.		Ash Hollow		South Dakota	Great Plains	Miocene	Clarendonian	2.508	16.465	10.3968
SDSM 53219 AR	Equinae	Hipparionini	Pseudhipparion	sp.		Ash Hollow		South Dakota	Great Plains	Miocene	Clarendonian	2.768	17.726	10.6544
SDSM 53219 CJ	Equinae	Hipparionini	Pseudhipparion	sp.		Ash Hollow		South Dakota	Great Plains	Miocene	Clarendonian	2.564	15.743	9.8317
SDSM 53219 CZ	Equinae	Hipparionini	Neohipparion	sp.		Ash Hollow		South Dakota	Great Plains	Miocene	Clarendonian	4.24	23.264	11.298
SDSM 53219 DS	Equinae	Hipparionini	Pseudhipparion	sp.		Ash Hollow		South Dakota	Great Plains	Miocene	Clarendonian	2.124	15.917	10.9215
SDSM 53219 X	Equinae	Hipparionini	Pseudhipparion	sp.		Ash Hollow		South Dakota	Great Plains	Miocene	Clarendonian	2.269	16.83	11.1729
SDSM 53219 Y	Equinae	Hipparionini	Pseudhipparion	sp.		Ash Hollow		South Dakota	Great Plains	Miocene	Clarendonian	2.658	16.033	9.83416
SDSM 53220	Equinae	Equini	Pliohippus	sp.		Ash Hollow		South Dakota	Great Plains	Miocene	Clarendonian	3.476	15.685	8.41288
SDSM 53220 A	Equinae	Equini	Pliohippus	sp.		Ash Hollow		South Dakota	Great Plains	Miocene	Clarendonian	4.003	18.53	9.26153
SDSM 53220 C	Equinae	Equini	Pliohippus	sp.		Ash Hollow		South Dakota	Great Plains	Miocene	Clarendonian	5.503	25.765	10.9832
SDSM 53220-01	Equinae	Equini	Pliohippus	sp.		Ash Hollow		South Dakota	Great Plains	Miocene	Clarendonian	3.56	18.638	9.87812
SDSM 5622	Equinae	"Merychippini"	Merychippus	sp.		Lower Snake Creek		Nebraska	Great Plains	Miocene	Barstovian	2.967	17.13	9.94486
SDSM 5622	Equinae	"Merychippini"	Merychippus	sp.		Lower Snake Creek		Nebraska	Great Plains	Miocene	Barstovian	4.044	19.354	9.62421
SDSM 577 Q	Equinae	Equini	Calippus	sp.		Ash Hollow		South Dakota	Great Plains	Miocene	Clarendonian	2.57	16.329	10.1858
SDSM 577P-03	Equinae	Equini	Calippus	sp.		Ash Hollow		South Dakota	Great Plains	Miocene	Clarendonian	2.165	13.712	9.31905
SDSM 62281	Equinae	Hipparionini	Pseudhipparion	sp.	P4	Ash Hollow		South Dakota	Great Plains	Miocene	Clarendonian	2.519	15.003	9.45288
SDSM 62281	Equinae	Hipparionini	Pseudhipparion	sp.	M1	Ash Hollow		South Dakota	Great Plains	Miocene	Clarendonian	2.125	11.108	7.62003
SDSM 62281	Equinae	Hipparionini	Pseudhipparion	sp.	M2	Ash Hollow		South Dakota	Great Plains	Miocene	Clarendonian	2.461	15.204	9.69175
SDSM 62290	Equinae	Equini	Equus	sp.				South Dakota	Great Plains	Pleistocene	Irv/Rancho	8.639	33.401	11.3639
SDSM 65125	Equinae	Hipparionini	Merychippus	sp.	P2	Lower Snake Creek		Nebraska	Great Plains	Miocene	Barstovian	3.697	18.294	9.51446
SDSM 65125	Equinae	Hipparionini	Merychippus	sp.		Lower Snake Creek		Nebraska	Great Plains	Miocene	Barstovian	3.052	18.611	10.6531
SDSM 7861	Equinae	Hipparionini	Pseudhipparion	sp.	P3	Ash Hollow		South Dakota	Great Plains	Miocene	Clarendonian	2.747	14.836	8.95133
SDSM 7861	Equinae	Hipparionini	Pseudhipparion	sp.	P4	Ash Hollow		South Dakota	Great Plains	Miocene	Clarendonian	2.602	15.268	9.46517
SDSM 7861	Equinae	Hipparionini	Pseudhipparion	sp.	M1	Ash Hollow		South Dakota	Great Plains	Miocene	Clarendonian	2.311	13.855	9.11395
SDSM 7861	Equinae	Hipparionini	Pseudhipparion	sp.	M2	Ash Hollow		South Dakota	Great Plains	Miocene	Clarendonian	2.201	13.748	9.26679
UCMP 124927	Equinae	Equini	Pliohippus	sp.	P2	Mehrten		California	California	Miocene	Hemphillian	5.674	18.883	7.92732
UCMP 124927	Equinae	Equini	Pliohippus	sp.	P3	Mehrten		California	California	Miocene	Hemphillian	5.84	19.645	8.12916
UCMP 124927	Equinae	Equini	Pliohippus	sp.	P4	Mehrten		California	California	Miocene	Hemphillian	5.63	19.837	8.3603
UCMP 124927	Equinae	Equini	Pliohippus	sp.	M1	Mehrten		California	California	Miocene	Hemphillian	5.642	20.009	8.42382
UCMP 124927	Equinae	Equini	Pliohippus	sp.	M2	Mehrten		California	California	Miocene	Hemphillian	5.785	20.807	8.65083
UCMP 124927	Equinae	Equini	Pliohippus	sp.	M3	Mehrten		California	California	Miocene	Hemphillian	4.393	18.575	8.86234
UCMP 21422	Equinae	Equini	Scaphohippus	sumani	P3	Barstow		California	Great Basin	Miocene	Barstovian	1.522	9.435	7.64777
UCMP 21422	Equinae	Equini	Scaphohippus	sumani	P4	Barstow		California	Great Basin	Miocene	Barstovian	1.503	8.133	6.63394
UCMP 21422	Equinae	Equini	Scaphohippus	sumani	M1	Barstow		California	Great Basin	Miocene	Barstovian	1.479	7.921	6.51322
UCMP 21422	Equinae	Equini	Scaphohippus	sumani	M2	Barstow		California	Great Basin	Miocene	Barstovian	1.258	8.126	7.24497
UCMP 23088	Equinae	Hipparionini	Merychippus	seversus	P2	Mascall		Oregon	Columbia Plateau	Miocene	Barstovian	2.72	14.885	9.02536
UCMP 23088	Equinae	Hipparionini	Merychippus	seversus	P3	Mascall		Oregon	Columbia Plateau	Miocene	Barstovian	3.297	16.699	9.19668
UCMP 23088	Equinae	Hipparionini	Merychippus	seversus	P4	Mascall		Oregon	Columbia Plateau	Miocene	Barstovian	3.036	16.332	9.37321
UCMP 23088	Equinae	Hipparionini	Merychippus	seversus	M1	Mascall		Oregon	Columbia Plateau	Miocene	Barstovian	2.829	16.115	9.58107
UCMP 23088	Equinae	Hipparionini	Merychippus	seversus	M2	Mascall		Oregon	Columbia Plateau	Miocene	Barstovian	2.608	15.395	9.53292
UCMP 23088	Equinae	Hipparionini	Merychippus	seversus	M3	Mascall		Oregon	Columbia Plateau	Miocene	Barstovian	1.25	6.088	5.44527
UCMP 27126	Equinae	Hipparionini	Neohipparion	leptode	P2	Thousand Creek		Nevada	Great Basin	Miocene	Hemphillian	3.999	18.828	9.41518
UCMP 27126	Equinae	Hipparionini	Neohipparion	leptode	P3	Thousand Creek		Nevada	Great Basin	Miocene	Hemphillian	4.475	20.473	9.67799
UCMP 27126	Equinae	Hipparionini	Neohipparion	leptode	P4	Thousand Creek		Nevada	Great Basin	Miocene	Hemphillian	4.176	21.579	10.5597
UCMP 27126	Equinae	Hipparionini	Neohipparion	leptode	M1	Thousand Creek		Nevada	Great Basin	Miocene	Hemphillian	4.392	20.166	9.62252
UCMP 27126	Equinae	Hipparionini	Neohipparion	leptode	M2	Thousand Creek		Nevada	Great Basin	Miocene	Hemphillian	3.701	19.425	10.0972
UCMP 27126	Equinae	Hipparionini	Neohipparion	leptode	M3	Thousand Creek		Nevada	Great Basin	Miocene	Hemphillian	2.875	17.024	10.0402
UCMP 30200	Equinae	Equini	Dinohippus	interpolatus	P2	Ogallala		Texas	Great Plains	Miocene	Hemphillian	6.364	14.528	5.75892
UCMP 30200	Equinae	Equini	Dinohippus	interpolatus	P3	Ogallala		Texas	Great Plains	Miocene	Hemphillian	7.384	21.108	7.76786
UCMP 30200	Equinae	Equini	Dinohippus	interpolatus	P4	Ogallala		Texas	Great Plains	Miocene	Hemphillian	7.274	21.113	7.82822
UCMP 30200	Equinae	Equini	Dinohippus	interpolatus	M1	Ogallala		Texas	Great Plains	Miocene	Hemphillian	5.466	19.965	8.53954
UCMP 30200	Equinae	Equini	Dinohippus	interpolatus	M2	Ogallala		Texas	Great Plains	Miocene	Hemphillian	5.955	21.416	8.77602
UCMP 30200	Equinae	Equini	Dinohippus	interpolatus	M3	Ogallala		Texas	Great Plains	Miocene	Hemphillian	6.075	21.705	8.80616
UCMP 30225	Equinae	Equini	Astrohippus	ansae	P2	Ogallala		Texas	Great Plains	Miocene	Hemphillian	3.398	14.722	7.98647
UCMP 30225	Equinae	Equini	Astrohippus	ansae	P3	Ogallala		Texas	Great Plains	Miocene	Hemphillian	3.653	16.034	8.38913
UCMP 30225	Equinae	Equini	Astrohippus	ansae	P4	Ogallala		Texas	Great Plains	Miocene	Hemphillian	3.747	16.514	8.53121
UCMP 30225	Equinae	Equini	Astrohippus	ansae	M1	Ogallala		Texas	Great Plains	Miocene	Hemphillian	3.311	15.199	8.35286
UCMP 30225	Equinae	Equini	Astrohippus	ansae	M2	Ogallala		Texas	Great Plains	Miocene	Hemphillian	3.091	15.504	8.81849
UCMP 30225	Equinae	Equini	Astrohippus	ansae	M3	Ogallala		Texas	Great Plains	Miocene	Hemphillian	2.919	16.35	9.56975
UCMP 30813	Equinae	Equini	Dinohippus	interpolatus	P2	Ogallala		Texas	Great Plains	Miocene	Hemphillian	5.277	18.648	8.11781
UCMP 30813	Equinae	Equini	Dinohippus	interpolatus	P3	Ogallala		Texas	Great Plains	Miocene	Hemphillian	5.114	19.322	8.54421
UCMP 30813	Equinae	Equini	Dinohippus	interpolatus	P4	Ogallala		Texas	Great Plains	Miocene	Hemphillian	5.376	19.499	8.40974
UCMP 30813	Equinae	Equini	Dinohippus	interpolatus	M1	Ogallala		Texas	Great Plains	Miocene	Hemphillian	4.691	16.918	7.81117
UCMP 30813	Equinae	Equini	Dinohippus	interpolatus	M2	Ogallala		Texas	Great Plains	Miocene	Hemphillian	4.769	18.184	8.32675
UCMP 30813	Equinae	Equini	Dinohippus	interpolatus	M3	Ogallala		Texas	Great Plains	Miocene	Hemphillian	3.967	16.435	8.25161
UCMP 31256	Equinae	Hipparionini	Neohipparion	eurystyle	P2	Ogallala		Texas	Great Plains	Miocene	Clarendonian	3.497	13.939	7.4539
UCMP 31256	Equinae	Hipparionini	Neohipparion	eurystyle	P3	Ogallala		Texas	Great Plains	Miocene	Clarendonian	4.028	16.736	8.33886
UCMP 31256	Equinae	Hipparionini	Neohipparion	eurystyle	P4	Ogallala		Texas	Great Plains	Miocene	Clarendonian	4.433	17.531	8.32641
UCMP 31256	Equinae	Hipparionini	Neohipparion	eurystyle	M1	Ogallala		Texas	Great Plains	Miocene	Clarendonian	3.534	15.626	8.31217
UCMP 31256	Equinae	Hipparionini	Neohipparion	eurystyle	M2	Ogallala		Texas	Great Plains	Miocene	Clarendonian	4.23	17.247	8.38578
UCMP 31256	Equinae	Hipparionini	Neohipparion	eurystyle	M3	Ogallala		Texas	Great Plains	Miocene	Clarendonian	3.825	17.206	8.7976
UCMP 31875	Equinae	Equini	Pliohippus	tantalus	P2	Mehrten		California	California	Miocene	Hemphillian	5.987	18.632	7.61474
UCMP 31875	Equinae	Equini	Pliohippus	tantalus	P3	Mehrten		California	California	Miocene	Hemphillian	5.813	20.004	8.29692
UCMP 31875	Equinae	Equini	Pliohippus	tantalus	P4	Mehrten		California	California	Miocene	Hemphillian	5.647	19.545	8.22483
UCMP 31875	Equinae	Equini	Pliohippus	tantalus	M1	Mehrten		California	California	Miocene	Hemphillian	4.576	17.931	8.38227
UCMP 31875	Equinae	Equini	Pliohippus	tantalus	M2	Mehrten		California	California	Miocene	Hemphillian	4.688	14.688	6.78373
UCMP 31875	Equinae	Equini	Pliohippus	tantalus	M3	Mehrten		California	California	Miocene	Hemphillian	4.334	18.705	8.9849
UCMP 32306	Equinae	Equini	Pliohippus	cf. pernix	P2	Ogallala		South Dakota	Great Plains	Miocene	Clarendonian	4.41	18.003	8.57286
UCMP 32306	Equinae	Equini	Pliohippus	cf. pernix	P3	Ogallala		South Dakota	Great Plains	Miocene	Clarendonian	4.923	19.868	8.95446
UCMP 32306	Equinae	Equini	Pliohippus	cf. pernix	P4	Ogallala		South Dakota	Great Plains	Miocene	Clarendonian	4.893	21.376	9.6636
UCMP 32306	Equinae	Equini	Pliohippus	cf. pernix	M1	Ogallala		South Dakota	Great Plains	Miocene	Clarendonian	4.11	17.154	8.46144
UCMP 32306	Equinae	Equini	Pliohippus	cf. pernix	M2	Ogallala		South Dakota	Great Plains	Miocene	Clarendonian	4.506	19.244	9.06567
UCMP 32306	Equinae	Equini	Pliohippus	cf. pernix	M3	Ogallala		South Dakota	Great Plains	Miocene	Clarendonian	2.925	17.789	10.4013
UCMP 32503	Equinae	Hipparionini	Pseudhipparion	retrusum	P4	Valentine	Burge	Nebraska	Great Plains	Miocene	Clarendonian	2.9	14.972	8.79186
UCMP 32503	Equinae	Hipparionini	Pseudhipparion	retrusum	M1	Valentine	Burge	Nebraska	Great Plains	Miocene	Clarendonian	2.855	14.897	8.81649
UCMP 32503	Equinae	Hipparionini	Pseudhipparion	retrusum	M2	Valentine	Burge	Nebraska	Great Plains	Miocene	Clarendonian	2.94	15.468	9.02112
UCMP 32503	Equinae	Hipparionini	Pseudhipparion	retrusum	M3	Valentine	Burge	Nebraska	Great Plains	Miocene	Clarendonian	2.337	13.184	8.62418
UCMP 32503	Equinae	Hipparionini	Pseudhipparion	retrusum	P2	Valentine	Burge	Nebraska	Great Plains	Miocene	Clarendonian	2.95	17.147	9.98337
UCMP 32503	Equinae	Hipparionini	Pseudhipparion	retrusum	P3	Valentine	Burge	Nebraska	Great Plains	Miocene	Clarendonian	3.044	14.716	8.43466
UCMP 32504	Equinae	Hipparionini	Pseudhipparion	retrusum	P2	Valentine	Burge	Nebraska	Great Plains	Miocene	Clarendonian	2.691	14.3	8.71724
UCMP 32504	Equinae	Hipparionini	Pseudhipparion	retrusum	P3	Valentine	Burge	Nebraska	Great Plains	Miocene	Clarendonian	3.005	16.399	9.46009
UCMP 32504	Equinae	Hipparionini	Pseudhipparion	retrusum	P4	Valentine	Burge	Nebraska	Great Plains	Miocene	Clarendonian	2.831	16.388	9.73993
UCMP 32504	Equinae	Hipparionini	Pseudhipparion	retrusum	M1	Valentine	Burge	Nebraska	Great Plains	Miocene	Clarendonian	2.432	15.154	9.7173
UCMP 32504	Equinae	Hipparionini	Pseudhipparion	retrusum	M2	Valentine	Burge	Nebraska	Great Plains	Miocene	Clarendonian	2.68	15.372	9.38994
UCMP 32504	Equinae	Hipparionini	Pseudhipparion	retrusum	M3	Valentine	Burge	Nebraska	Great Plains	Miocene	Clarendonian	1.73	11.071	8.41713
UCMP 32773	Equinae	Equini	Calippus	regulus	P2	Ogallala		Texas	Great Plains	Miocene	Clarendonian	1.179	8.685	7.99858
UCMP 32773	Equinae	Equini	Calippus	regulus	P3	Ogallala		Texas	Great Plains	Miocene	Clarendonian	1.505	9.169	7.47401
UCMP 32773	Equinae	Equini	Calippus	regulus	P4	Ogallala		Texas	Great Plains	Miocene	Clarendonian	1.68	9.572	7.38496
UCMP 32773	Equinae	Equini	Calippus	regulus	M1	Ogallala		Texas	Great Plains	Miocene	Clarendonian	1.464	8.664	7.16058
UCMP 32773	Equinae	Equini	Calippus	regulus	M2	Ogallala		Texas	Great Plains	Miocene	Clarendonian	1.33	9.539	8.27136
UCMP 32773	Equinae	Equini	Calippus	regulus	M3	Ogallala		Texas	Great Plains	Miocene	Clarendonian	1.184	8.518	7.8282
UCMP 32814	Equinae	Equini	Calippus	martini	P2	Laverne		Oklahoma	Great Plains	Miocene	Clarendonian	3.309	10.734	5.90083
UCMP 32814	Equinae	Equini	Calippus	martini	P3	Laverne		Oklahoma	Great Plains	Miocene	Clarendonian	4.317	11.948	5.75048
UCMP 32814	Equinae	Equini	Calippus	martini	P4	Laverne		Oklahoma	Great Plains	Miocene	Clarendonian	4.218	12.506	6.08927
UCMP 32814	Equinae	Equini	Calippus	martini	M1	Laverne		Oklahoma	Great Plains	Miocene	Clarendonian	3.811	11.695	5.99074
UCMP 32814	Equinae	Equini	Calippus	martini	M2	Laverne		Oklahoma	Great Plains	Miocene	Clarendonian	3.588	12.259	6.47186
UCMP 32814	Equinae	Equini	Calippus	martini	M3	Laverne		Oklahoma	Great Plains	Miocene	Clarendonian	2.163	7.74	5.26275
UCMP 33481	Equinae	Equini	Pliohippus	sp.	P2	Ogallala		Texas	Great Plains	Miocene	Clarendonian	5.213	16.8	7.3581
UCMP 33481	Equinae	Equini	Pliohippus	sp.	P3	Ogallala		Texas	Great Plains	Miocene	Clarendonian	5.462	17.666	7.55897
UCMP 33481	Equinae	Equini	Pliohippus	sp.	P4	Ogallala		Texas	Great Plains	Miocene	Clarendonian	5.294	18.05	7.84486
UCMP 33481	Equinae	Equini	Pliohippus	sp.	M1	Ogallala		Texas	Great Plains	Miocene	Clarendonian	4.902	17.982	8.12178
UCMP 33481	Equinae	Equini	Pliohippus	sp.	M2	Ogallala		Texas	Great Plains	Miocene	Clarendonian	4.887	17.945	8.1175
UCMP 33481	Equinae	Equini	Pliohippus	sp.	M3	Ogallala		Texas	Great Plains	Miocene	Clarendonian	3.973	16.327	8.19119
UCMP 34032	Equinae	Equini	Equus	simplicedens	P2	Glenns Ferry		Idaho	Columbia Plateau	Pliocene	Blancan	8.035	25.654	9.05028
UCMP 34032	Equinae	Equini	Equus	simplicedens	P3	Glenns Ferry		Idaho	Columbia Plateau	Pliocene	Blancan	9.273	29.776	9.77814
UCMP 34032	Equinae	Equini	Equus	simplicedens	P4	Glenns Ferry		Idaho	Columbia Plateau	Pliocene	Blancan	7.787	27.985	10.0286
UCMP 34032	Equinae	Equini	Equus	simplicedens	M1	Glenns Ferry		Idaho	Columbia Plateau	Pliocene	Blancan	8.075	26.64	9.37482
UCMP 34032	Equinae	Equini	Equus	simplicedens	M2	Glenns Ferry		Idaho	Columbia Plateau	Pliocene	Blancan	7.912	28.047	9.9711
UCMP 34032	Equinae	Equini	Equus	simplicedens	M3	Glenns Ferry		Idaho	Columbia Plateau	Pliocene	Blancan	4.446	14.428	6.8426
UCMP 34511	Equinae	Hipparionini	Hipparion	sp.	P3	Green Valley		California	California	Miocene	Clarendonian	4.633	18.518	8.60326
UCMP 34511	Equinae	Hipparionini	Hipparion	sp.	P4	Green Valley		California	California	Miocene	Clarendonian	4.411	18.855	8.97755
UCMP 34511	Equinae	Hipparionini	Hipparion	sp.	M1	Green Valley		California	California	Miocene	Clarendonian	3.629	16.265	8.53809
UCMP 34511	Equinae	Hipparionini	Hipparion	sp.	M2	Green Valley		California	California	Miocene	Clarendonian	4.251	18.28	8.86606
UCMP 34511	Equinae	Hipparionini	Hipparion	sp.	M3	Green Valley		California	California	Miocene	Clarendonian	4.14	18.693	9.18711
UCMP 50750	Equinae	Equini	Scaphohippus	sumani	P2	Caliente		California	California	Miocene	Barstovian	3.456	15.398	8.28281
UCMP 50750	Equinae	Equini	Scaphohippus	sumani	P3	Caliente		California	California	Miocene	Barstovian	3.816	16.727	8.56276
UCMP 50750	Equinae	Equini	Scaphohippus	sumani	P4	Caliente		California	California	Miocene	Barstovian	3.832	16.766	8.56479
UCMP 50750	Equinae	Equini	Scaphohippus	sumani	M1	Caliente		California	California	Miocene	Barstovian	3.549	16.497	8.75693
UCMP 50750	Equinae	Equini	Scaphohippus	sumani	M2	Caliente		California	California	Miocene	Barstovian	3.685	16.929	8.81886
UCMP 50750	Equinae	Equini	Scaphohippus	sumani	M3	Caliente		California	California	Miocene	Barstovian	2.77	14.313	8.59985
UCMP 50950	Equinae	Equini	Scaphohippus	sumani	P2	Caliente		California	California	Miocene	Barstovian	3.148	13.598	7.66404
UCMP 50950	Equinae	Equini	Scaphohippus	sumani	P3	Caliente		California	California	Miocene	Barstovian	3.795	14.066	7.22046
UCMP 50950	Equinae	Equini	Scaphohippus	sumani	P4	Caliente		California	California	Miocene	Barstovian	3.904	16.113	8.15495
UCMP 50950	Equinae	Equini	Scaphohippus	sumani	M1	Caliente		California	California	Miocene	Barstovian	3.751	15.973	8.24732
UCMP 50950	Equinae	Equini	Scaphohippus	sumani	M2	Caliente		California	California	Miocene	Barstovian	3.796	17.389	8.92507
UCMP 50950	Equinae	Equini	Scaphohippus	sumani	M3	Caliente		California	California	Miocene	Barstovian	3.271	13.834	7.64905
UCMP 51000	Equinae	Equini	Scaphohippus	sumani	P2	Caliente		California	California	Miocene	Barstovian	3.536	15.716	8.35768
UCMP 51000	Equinae	Equini	Scaphohippus	sumani	P3	Caliente		California	California	Miocene	Barstovian	4.195	17.132	8.36454
UCMP 51000	Equinae	Equini	Scaphohippus	sumani	P4	Caliente		California	California	Miocene	Barstovian	3.74	17.186	8.88667
UCMP 51000	Equinae	Equini	Scaphohippus	sumani	M1	Caliente		California	California	Miocene	Barstovian	3.757	17.542	9.05021
UCMP 51000	Equinae	Equini	Scaphohippus	sumani	M2	Caliente		California	California	Miocene	Barstovian	3.657	17.112	8.94825
UCMP 51000	Equinae	Equini	Scaphohippus	sumani	M3	Caliente		California	California	Miocene	Barstovian	2.35	12.234	7.98058
UCMP 56278	Equinae	Equini	Pliohippus	sp.	P2	Green Valley		California	California	Miocene	Clarendonian	4.51	15.379	7.24169
UCMP 56278	Equinae	Equini	Pliohippus	sp.	P3	Green Valley		California	California	Miocene	Clarendonian	5.391	17.642	7.59824
UCMP 56278	Equinae	Equini	Pliohippus	sp.	P4	Green Valley		California	California	Miocene	Clarendonian	5.569	18.753	7.94661
UCMP 56278	Equinae	Equini	Pliohippus	sp.	M1	Green Valley		California	California	Miocene	Clarendonian	5.691	19.436	8.14728
UCMP 56278	Equinae	Equini	Pliohippus	sp.	M2	Green Valley		California	California	Miocene	Clarendonian	6.044	20.692	8.41667
UCMP 56278	Equinae	Equini	Pliohippus	sp.	M3	Green Valley		California	California	Miocene	Clarendonian	5.754	22.146	9.23231
UCMP 64609	Equinae	Hipparionini	Neohipparion	floresi	P2			Chihuahua	Gulf Coast	Miocene	Hemphillian	3.335	17.131	9.38069
UCMP 64609	Equinae	Hipparionini	Neohipparion	floresi	P3			Chihuahua	Gulf Coast	Miocene	Hemphillian	3.728	19.838	10.2745
UCMP 64609	Equinae	Hipparionini	Neohipparion	floresi	P4			Chihuahua	Gulf Coast	Miocene	Hemphillian	3.633	18.174	9.53494
UCMP 64609	Equinae	Hipparionini	Neohipparion	floresi	M1			Chihuahua	Gulf Coast	Miocene	Hemphillian	3.155	18.025	10.1479
UCMP 64609	Equinae	Hipparionini	Neohipparion	floresi	M2			Chihuahua	Gulf Coast	Miocene	Hemphillian	3.024	16.323	9.38662
UCMP 64609	Equinae	Hipparionini	Neohipparion	floresi	M3			Chihuahua	Gulf Coast	Miocene	Hemphillian	2.365	15.862	10.3144
UCMP 69575	Equinae	Hipparionini	Hipparion	forcei	P2	Ricardo		California	Great Basin	Miocene	Clarendonian	2.627	14.236	8.7833
UCMP 69575	Equinae	Hipparionini	Hipparion	forcei	P3	Ricardo		California	Great Basin	Miocene	Clarendonian	3.272	19.468	10.7625
UCMP 69575	Equinae	Hipparionini	Hipparion	forcei	P4	Ricardo		California	Great Basin	Miocene	Clarendonian	3.362	19.839	10.8198
UCMP 69575	Equinae	Hipparionini	Hipparion	forcei	M1	Ricardo		California	Great Basin	Miocene	Clarendonian	2.872	17.222	10.1623
UCMP 69575	Equinae	Hipparionini	Hipparion	forcei	M2	Ricardo		California	Great Basin	Miocene	Clarendonian	2.871	17.385	10.2603
UCMP 69575	Equinae	Hipparionini	Hipparion	forcei	M3	Ricardo		California	Great Basin	Miocene	Clarendonian	2.056	12.905	9.00008
UCMP 97903	Equinae	Equini	Protohippus	perditus	P2	Valentine	Devil's Gulch	Nebraska	Great Plains	Miocene	Barstovian	3.805	13.47	6.90542
UCMP 97903	Equinae	Equini	Protohippus	perditus	P3	Valentine	Devil's Gulch	Nebraska	Great Plains	Miocene	Barstovian	4.114	16.076	7.92585
UCMP 97903	Equinae	Equini	Protohippus	perditus	P4	Valentine	Devil's Gulch	Nebraska	Great Plains	Miocene	Barstovian	3.993	16.789	8.40185
UCMP 97903	Equinae	Equini	Protohippus	perditus	M1	Valentine	Devil's Gulch	Nebraska	Great Plains	Miocene	Barstovian	3.436	15.435	8.32684
UCMP 97903	Equinae	Equini	Protohippus	perditus	M2	Valentine	Devil's Gulch	Nebraska	Great Plains	Miocene	Barstovian	3.526	16.554	8.8158
UCMP 97903	Equinae	Equini	Protohippus	perditus	M3	Valentine	Devil's Gulch	Nebraska	Great Plains	Miocene	Barstovian	2.622	14.406	8.89666
UF 32300	Equinae	Hipparionini	Cormohipparion	sp.	P2	Love Bone Bed		Florida	Gulf Coast	Miocene	Clarendonian	2.83	18.072	10.7427
UF 32300	Equinae	Hipparionini	Cormohipparion	sp.	P3	Love Bone Bed		Florida	Gulf Coast	Miocene	Clarendonian	3.169	18.239	10.2457
UF 32300	Equinae	Hipparionini	Cormohipparion	sp.	P4	Love Bone Bed		Florida	Gulf Coast	Miocene	Clarendonian	3.03	20.911	12.0131
UF 32300	Equinae	Hipparionini	Cormohipparion	sp.	M1	Love Bone Bed		Florida	Gulf Coast	Miocene	Clarendonian	2.657	18.581	11.3992
UF 32300	Equinae	Hipparionini	Cormohipparion	sp.	M2	Love Bone Bed		Florida	Gulf Coast	Miocene	Clarendonian	2.578	16.927	10.5424
UF 32300	Equinae	Hipparionini	Cormohipparion	sp.	M3	Love Bone Bed		Florida	Gulf Coast	Miocene	Clarendonian	2.086	15.56	10.7734
UF 57343	Equinae	Hipparionini	Pseudhipparion	simpsoni	P4	Bone Valley		Florida	Gulf Coast	Miocene	Hemphillian	0.709	5.472	6.49865
UF 57343	Equinae	Hipparionini	Pseudhipparion	simpsoni	P4	Bone Valley		Florida	Gulf Coast	Miocene	Hemphillian	0.627	5.207	6.57588
UF 57343	Equinae	Hipparionini	Pseudhipparion	simpsoni	P4	Bone Valley		Florida	Gulf Coast	Miocene	Hemphillian	0.539	4.804	6.54348
UF 57343	Equinae	Hipparionini	Pseudhipparion	simpsoni	P4	Bone Valley		Florida	Gulf Coast	Miocene	Hemphillian	0.608	4.925	6.31618
UF 58311	Equinae	Hipparionini	Pseudhipparion	simpsoni	P4	Ft Green Mine		Florida	Gulf Coast	Miocene	Hemphillian	1.376	11.884	10.131
UF 58311	Equinae	Hipparionini	Pseudhipparion	simpsoni	P4	Ft Green Mine		Florida	Gulf Coast	Miocene	Hemphillian	1.23	11.149	10.0527
UF 58311	Equinae	Hipparionini	Pseudhipparion	simpsoni	P4	Ft Green Mine		Florida	Gulf Coast	Miocene	Hemphillian	1.07	10.257	9.91582
UF 58311	Equinae	Hipparionini	Pseudhipparion	simpsoni	P4	Ft Green Mine		Florida	Gulf Coast	Miocene	Hemphillian	1.035	9.762	9.59552
UNSM 113025	Equinae	Equini	Equus	calobutus	M3			Nebraska	Great Plains	Pleistocene	Irv/Rancho	5.253	24.634	10.7481
UNSM 113026	Equinae	Equini	Equus	calobutus	P4			Nebraska	Great Plains	Pleistocene	Irv/Rancho	7.149	32.2208	12.0507
UNSM 113091	Equinae	Equini	Equus	calobutus	M1			Nebraska	Great Plains	Pleistocene	Irv/Rancho	6.778	28.878	11.0922
UNSM 118794	Equinae	Equini	Equus	calobutus	P2			Nebraska	Great Plains	Pleistocene	Irv/Rancho	8.817	30.627	10.3144
UNSM 118794	Equinae	Equini	Equus	calobutus	P3			Nebraska	Great Plains	Pleistocene	Irv/Rancho	9.832	33.214	10.5925
UNSM 118794	Equinae	Equini	Equus	calobutus	P4			Nebraska	Great Plains	Pleistocene	Irv/Rancho	10.343	30.605	9.51632
UNSM 118794	Equinae	Equini	Equus	calobutus	M1			Nebraska	Great Plains	Pleistocene	Irv/Rancho	7.646	27.591	9.97816
UNSM 118794	Equinae	Equini	Equus	calobutus	M2			Nebraska	Great Plains	Pleistocene	Irv/Rancho	7.857	26.89	9.59318
UNSM 123506	Equinae	Equini	Equus	sp.		Loess		Nebraska	Great Plains	Pleistocene	Irv/Rancho	4.857	22.864	10.3745
UNSM 123506	Equinae	Equini	Equus	sp.		Loess		Nebraska	Great Plains	Pleistocene	Irv/Rancho	5.159	23.19	10.2098
UNSM 123506	Equinae	Equini	Equus	sp.		Loess		Nebraska	Great Plains	Pleistocene	Irv/Rancho	4.225	20.43	9.93928
UNSM 123613	Equinae	Equini	Equus	sp.		cave		New Mexico	Great Basin	Pleistocene	Irv/Rancho	4.652	21.366	9.90612
UNSM 123657	Equinae	Equini	Equus	spp.	M3			Kentucky	Eastern US	Pleistocene	Irv/Rancho	5.215	26.164	11.4572
UNSM 123658	Equinae	Equini	Equus	spp.				Kentucky	Eastern US	Pleistocene	Irv/Rancho	5.533	31.701	13.477
UNSM 125528	Equinae	Equini	Protohippus	perditus	P3	Valentine		Nebraska	Great Plains	Miocene	Barstovian	2.387	15.074	9.75669
UNSM 125529	Equinae	Equini	Protohippus	perditus	P3	Valentine		Nebraska	Great Plains	Miocene	Barstovian	3.322	15.088	8.27812
UNSM 125530	Equinae	Hipparionini	Neohipparion	republicanus	P3	Valentine		Nebraska	Great Plains	Miocene	Barstovian	3.388	19.773	10.7424
UNSM 125531	Equinae	Hipparionini	Pseudhipparion	sp.	P3	Valentine		Nebraska	Great Plains	Miocene	Barstovian	3.495	16.593	8.87567
UNSM 125532	Anchitheriinae	"Anchitheriini"	Hypohippus	sp.	P3	Valentine		Nebraska	Great Plains	Miocene	Barstovian	5.719	15.084	6.30749
UNSM 125533	Equinae	Hipparionini	Neohipparion	republicanus	P3	Valentine		Nebraska	Great Plains	Miocene	Barstovian	3.88	21.256	10.7911
UNSM 125534	Equinae	Equini	Calippus	placidus	P3	Valentine		Nebraska	Great Plains	Miocene	Barstovian	2.126	13.499	9.25806
UNSM 129108	Equinae	Equini	Equus	scotti				Nebraska	Great Plains	Pleistocene	Irv/Rancho	5.769	27.855	11.5972
UNSM 133050	Equinae	Equini	Equus	sp.		cave		New Mexico	Great Basin	Pleistocene	Irv/Rancho	4.779	19.32	8.83769
UNSM 133051	Equinae	Equini	Equus	sp.		cave		New Mexico	Great Basin	Pleistocene	Irv/Rancho	5.321	23.11	10.0185
UNSM 133052	Equinae	Equini	Equus	spp.				Kentucky	Eastern US	Pleistocene	Irv/Rancho	5.614	28.597	12.0694
UNSM 133053	Equinae	Equini	Equus	complicatus	M3			Kentucky	Eastern US	Pleistocene	Irv/Rancho	7.211	31.546	11.7475
UNSM 133054	Equinae	Equini	Equus	spp.				Kentucky	Eastern US	Pleistocene	Irv/Rancho	6.462	32.273	12.6957
UNSM 133055	Equinae	Equini	Equus	spp.				Kentucky	Eastern US	Pleistocene	Irv/Rancho	6.65	30.48	11.8196
UNSM 133056	Equinae	Equini	Equus	scotti				Nebraska	Great Plains	Pleistocene	Irv/Rancho	5.469	26.247	11.2234
UNSM 133057	Equinae	Equini	Equus	scotti				Nebraska	Great Plains	Pleistocene	Irv/Rancho	6.044	26.549	10.7991
UNSM 133058	Equinae	Equini	Equus	sp.		High Terrace		Nebraska	Great Plains	Pleistocene	Irv/Rancho	4.927	24.395	10.9903
UNSM 133059	Equinae	Equini	Equus	excelsus	P2			Nebraska	Great Plains	Pleistocene	Irv/Rancho	6.027	27.261	11.1043
UNSM 133059	Equinae	Equini	Equus	excelsus	P3			Nebraska	Great Plains	Pleistocene	Irv/Rancho	5.491	26.605	11.3537
UNSM 133059	Equinae	Equini	Equus	excelsus	P4			Nebraska	Great Plains	Pleistocene	Irv/Rancho	5.889	28.128	11.5909
UNSM 133060	Equinae	Equini	Equus	idahoensis	M2	Long Pine		Nebraska	Great Plains	Pliocene	Blancan	6.399	28.45	11.2467
UNSM 133061	Equinae	Equini	Equus	idahoensis	P3	Long Pine		Nebraska	Great Plains	Pliocene	Blancan	7.212	26.901	10.0171
UNSM 133061	Equinae	Equini	Equus	idahoensis	P4	Long Pine		Nebraska	Great Plains	Pliocene	Blancan	6.897	26.204	9.97786
UNSM 133061	Equinae	Equini	Equus	idahoensis	M1	Long Pine		Nebraska	Great Plains	Pliocene	Blancan	5.787	22.399	9.31112
UNSM 133061	Equinae	Equini	Equus	idahoensis	M2	Long Pine		Nebraska	Great Plains	Pliocene	Blancan	5.645	25.108	10.5677
UNSM 133061	Equinae	Equini	Equus	idahoensis	M3	Long Pine		Nebraska	Great Plains	Pliocene	Blancan	4.17	19.709	9.65154
UNSM 133063	Equinae	Equini	Equus	simplicidens	P2	Broadwater		Nebraska	Great Plains	Pliocene	Blancan	10.43	28.693	8.88452
UNSM 133063	Equinae	Equini	Equus	simplicidens	P3	Broadwater		Nebraska	Great Plains	Pliocene	Blancan	11.529	32.158	9.47094
UNSM 133063	Equinae	Equini	Equus	simplicidens	P4	Broadwater		Nebraska	Great Plains	Pliocene	Blancan	9.804	31.031	9.91047
UNSM 133063	Equinae	Equini	Equus	simplicidens	M1	Broadwater		Nebraska	Great Plains	Pliocene	Blancan	7.411	24.451	8.98169
UNSM 133063	Equinae	Equini	Equus	simplicidens	M2	Broadwater		Nebraska	Great Plains	Pliocene	Blancan	8.276	26.452	9.19493
UNSM 133063	Equinae	Equini	Equus	simplicidens	M3	Broadwater		Nebraska	Great Plains	Pliocene	Blancan	6.113	23.021	9.31101
UNSM 1349	Equinae	Equini	Equus	scotti	P2			Nebraska	Great Plains	Pleistocene	Irv/Rancho	6.601	22.292	8.67649
UNSM 1349	Equinae	Equini	Equus	scotti	P3			Nebraska	Great Plains	Pleistocene	Irv/Rancho	6.298	24.724	9.85184
UNSM 1349	Equinae	Equini	Equus	scotti	P4			Nebraska	Great Plains	Pleistocene	Irv/Rancho	6.236	26.128	10.4629
UNSM 1349	Equinae	Equini	Equus	scotti	M1			Nebraska	Great Plains	Pleistocene	Irv/Rancho	5.803	22.956	9.5295
UNSM 1349	Equinae	Equini	Equus	scotti	M2			Nebraska	Great Plains	Pleistocene	Irv/Rancho	5.788	23.472	9.75632
UNSM 1349	Equinae	Equini	Equus	scotti	M3			Nebraska	Great Plains	Pleistocene	Irv/Rancho	4.921	23.081	10.4047
UNSM 1350	Equinae	Equini	Equus	simplicidens	P2	Glenns Ferry		Idaho	Columbia Plateau	Pliocene	Blancan	8.757	25.928	8.76176
UNSM 1350	Equinae	Equini	Equus	simplicidens	P3	Glenns Ferry		Idaho	Columbia Plateau	Pliocene	Blancan	9.131	27.5	9.10067
UNSM 1350	Equinae	Equini	Equus	simplicidens	P4	Glenns Ferry		Idaho	Columbia Plateau	Pliocene	Blancan	8.907	28.051	9.39902
UNSM 1350	Equinae	Equini	Equus	simplicidens	M1	Glenns Ferry		Idaho	Columbia Plateau	Pliocene	Blancan	8.368	23.431	8.09991
UNSM 1350	Equinae	Equini	Equus	simplicidens	M2	Glenns Ferry		Idaho	Columbia Plateau	Pliocene	Blancan	9.177	28.251	9.32574
UNSM 1350	Equinae	Equini	Equus	simplicidens	M3	Glenns Ferry		Idaho	Columbia Plateau	Pliocene	Blancan	8.515	29.09	9.969
UNSM 1352	Equinae	Hipparionini	Pseudhipparion	sp.	P3	Valentine		Nebraska	Great Plains	Miocene	Barstovian	3.65	17.947	9.39389
UNSM 238941	Equinae	Hipparionini	Neohipparion	affine	P3	Ash Hollow		Nebraska	Great Plains	Miocene	Clarendonian	3.835	21.407	10.9313
UNSM 2626	Equinae	Hipparionini	Neohipparion	leptode		Ash Hollow		Nebraska	Great Plains	Miocene	Hemphillian	4.229	23.703	11.5262
UNSM 2634	Equinae	Equini	Protohippus	sp.	P3	Ash Hollow		Nebraska	Great Plains	Miocene	Hemphillian	3.382	16.582	9.01675
UNSM 2672	Equinae	Hipparionini	Neohipparion	sp.	P3	Valentine		Nebraska	Great Plains	Miocene	Barstovian	4.58	21.52	10.0556
UNSM 27799	Equinae	Equini	Calippus	sp.	P3	Ash Hollow		Nebraska	Great Plains	Miocene	Hemphillian	3.603	16.143	8.50457
UNSM 27845	Equinae	Hipparionini	Pseudhipparion	gratum	P2	Ash Hollow	Cap Rock	Nebraska	Great Plains	Miocene	Clarendonian	1.924	11.724	8.45227
UNSM 27845	Equinae	Hipparionini	Pseudhipparion	gratum	P3	Ash Hollow	Cap Rock	Nebraska	Great Plains	Miocene	Clarendonian	2.335	14.066	9.20507
UNSM 27845	Equinae	Hipparionini	Pseudhipparion	gratum	P4	Ash Hollow	Cap Rock	Nebraska	Great Plains	Miocene	Clarendonian	2.44	14.217	9.1015
UNSM 27845	Equinae	Hipparionini	Pseudhipparion	gratum	M1	Ash Hollow	Cap Rock	Nebraska	Great Plains	Miocene	Clarendonian	2.104	12.687	8.74654
UNSM 27845	Equinae	Hipparionini	Pseudhipparion	gratum	M2	Ash Hollow	Cap Rock	Nebraska	Great Plains	Miocene	Clarendonian	2.289	14.046	9.28389
UNSM 27845	Equinae	Hipparionini	Pseudhipparion	gratum	M3	Ash Hollow	Cap Rock	Nebraska	Great Plains	Miocene	Clarendonian	2.173	13.864	9.405
UNSM 27860	Equinae	Hipparionini	Cormohipparion	occidentale	P2	Ash Hollow	Cap Rock	Nebraska	Great Plains	Miocene	Clarendonian	3.846	17.352	8.848
UNSM 27860	Equinae	Hipparionini	Cormohipparion	occidentale	P3	Ash Hollow	Cap Rock	Nebraska	Great Plains	Miocene	Clarendonian	4.338	21.65	10.3947
UNSM 27860	Equinae	Hipparionini	Cormohipparion	occidentale	P4	Ash Hollow	Cap Rock	Nebraska	Great Plains	Miocene	Clarendonian	4.203	21.84	10.653
UNSM 27860	Equinae	Hipparionini	Cormohipparion	occidentale	M1	Ash Hollow	Cap Rock	Nebraska	Great Plains	Miocene	Clarendonian	3.923	18.596	9.38881
UNSM 27860	Equinae	Hipparionini	Cormohipparion	occidentale	M2	Ash Hollow	Cap Rock	Nebraska	Great Plains	Miocene	Clarendonian	3.829	18.925	9.67149
UNSM 27860	Equinae	Hipparionini	Cormohipparion	occidentale	M3	Ash Hollow	Cap Rock	Nebraska	Great Plains	Miocene	Clarendonian	2.394	13.567	8.76843
UNSM 27861	Equinae	Hipparionini	Cormohipparion	occidentale	P2	Ash Hollow	Cap Rock	Nebraska	Great Plains	Miocene	Clarendonian	3.459	16.751	9.0067
UNSM 27861	Equinae	Hipparionini	Cormohipparion	occidentale	P3	Ash Hollow	Cap Rock	Nebraska	Great Plains	Miocene	Clarendonian	3.585	18.189	9.60648
UNSM 27861	Equinae	Hipparionini	Cormohipparion	occidentale	P4	Ash Hollow	Cap Rock	Nebraska	Great Plains	Miocene	Clarendonian	3.913	19.402	9.80825
UNSM 27861	Equinae	Hipparionini	Cormohipparion	occidentale	M1	Ash Hollow	Cap Rock	Nebraska	Great Plains	Miocene	Clarendonian	3.462	18.251	9.80896
UNSM 27861	Equinae	Hipparionini	Cormohipparion	occidentale	M2	Ash Hollow	Cap Rock	Nebraska	Great Plains	Miocene	Clarendonian	3.505	18.281	9.76463
UNSM 27861	Equinae	Hipparionini	Cormohipparion	occidentale	M3	Ash Hollow	Cap Rock	Nebraska	Great Plains	Miocene	Clarendonian	3.076	17.456	9.95294
UNSM 27864	Equinae	Equini	Pliohippus	pernix	P2	Ash Hollow	Cap Rock	Nebraska	Great Plains	Miocene	Clarendonian	3.865	15.14	7.70107
UNSM 27864	Equinae	Equini	Pliohippus	pernix	P3	Ash Hollow	Cap Rock	Nebraska	Great Plains	Miocene	Clarendonian	4.55	17.845	8.36587
UNSM 27864	Equinae	Equini	Pliohippus	pernix	P4	Ash Hollow	Cap Rock	Nebraska	Great Plains	Miocene	Clarendonian	4.805	19.686	8.98071
UNSM 27864	Equinae	Equini	Pliohippus	pernix	M1	Ash Hollow	Cap Rock	Nebraska	Great Plains	Miocene	Clarendonian	4.552	18.391	8.61994
UNSM 27864	Equinae	Equini	Pliohippus	pernix	M2	Ash Hollow	Cap Rock	Nebraska	Great Plains	Miocene	Clarendonian	4.296	18.272	8.81564
UNSM 27864	Equinae	Equini	Pliohippus	pernix	M3	Ash Hollow	Cap Rock	Nebraska	Great Plains	Miocene	Clarendonian	2.568	13.973	8.71951
UNSM 27865	Equinae	Equini	Pliohippus	pernix	P2	Ash Hollow	Cap Rock	Nebraska	Great Plains	Miocene	Clarendonian	3.342	16.805	9.19254
UNSM 27865	Equinae	Equini	Pliohippus	pernix	P3	Ash Hollow	Cap Rock	Nebraska	Great Plains	Miocene	Clarendonian	3.897	18.678	9.46161
UNSM 27865	Equinae	Equini	Pliohippus	pernix	P4	Ash Hollow	Cap Rock	Nebraska	Great Plains	Miocene	Clarendonian	4.321	18.647	8.9705
UNSM 27865	Equinae	Equini	Pliohippus	pernix	M1	Ash Hollow	Cap Rock	Nebraska	Great Plains	Miocene	Clarendonian	3.372	16.576	9.02684
UNSM 27865	Equinae	Equini	Pliohippus	pernix	M2	Ash Hollow	Cap Rock	Nebraska	Great Plains	Miocene	Clarendonian	3.457	16.279	8.75544
UNSM 27875	Equinae	Hipparionini	Pseudhipparion	gratum	P2	Ash Hollow	Cap Rock	Nebraska	Great Plains	Miocene	Clarendonian	1.665	9.971	7.72737
UNSM 27875	Equinae	Hipparionini	Pseudhipparion	gratum	P3	Ash Hollow	Cap Rock	Nebraska	Great Plains	Miocene	Clarendonian	1.868	10.853	7.94075
UNSM 27875	Equinae	Hipparionini	Pseudhipparion	gratum	P4	Ash Hollow	Cap Rock	Nebraska	Great Plains	Miocene	Clarendonian	2.049	11.074	7.7363
UNSM 27875	Equinae	Hipparionini	Pseudhipparion	gratum	M1	Ash Hollow	Cap Rock	Nebraska	Great Plains	Miocene	Clarendonian	1.921	11.269	8.13058
UNSM 27875	Equinae	Hipparionini	Pseudhipparion	gratum	M2	Ash Hollow	Cap Rock	Nebraska	Great Plains	Miocene	Clarendonian	1.878	11.44	8.34792
UNSM 27875	Equinae	Hipparionini	Pseudhipparion	gratum	M3	Ash Hollow	Cap Rock	Nebraska	Great Plains	Miocene	Clarendonian	2.035	13.396	9.39059
UNSM 2997	Equinae	Hipparionini	Neohipparion	sp.	P3	Ash Hollow		Nebraska	Great Plains	Miocene	Hemphillian	3.003	18.998	10.963
UNSM 33162	Equinae	Equini	Equus	sp.				Nebraska	Great Plains	Pleistocene	Irv/Rancho	6.185	30.42	12.2318
UNSM 33508	Equinae	Equini	Equus	excelsus	P3			Nebraska	Great Plains	Pleistocene	Irv/Rancho	6.591	29.448	11.4704
UNSM 33508	Equinae	Equini	Equus	excelsus	P4			Nebraska	Great Plains	Pleistocene	Irv/Rancho	7.375	28.127	10.3572
UNSM 33527	Equinae	Equini	Equus	excelsus	M3			Nebraska	Great Plains	Pleistocene	Irv/Rancho	3.355	18.463	10.0799
UNSM 41996	Equinae	Equini	Equus	simplicidens	P3	Broadwater		Nebraska	Great Plains	Pliocene	Blancan	6.777	23.541	9.04287
UNSM 41996	Equinae	Equini	Equus	simplicidens	P4	Broadwater		Nebraska	Great Plains	Pliocene	Blancan	6.576	23.781	9.27362
UNSM 41996	Equinae	Equini	Equus	simplicidens	M1	Broadwater		Nebraska	Great Plains	Pliocene	Blancan	5.628	20.014	8.43639
UNSM 41996	Equinae	Equini	Equus	simplicidens	M2	Broadwater		Nebraska	Great Plains	Pliocene	Blancan	5.871	21.822	9.00614
UNSM 41996	Equinae	Equini	Equus	simplicidens	M3	Broadwater		Nebraska	Great Plains	Pliocene	Blancan	4.909	21.419	9.66724
UNSM 42087	Equinae	Equini	Equus	simplicidens	P2	Broadwater		Nebraska	Great Plains	Pliocene	Blancan	5.815	13.458	5.58092
UNSM 42087	Equinae	Equini	Equus	simplicidens	P3	Broadwater		Nebraska	Great Plains	Pliocene	Blancan	6.436	24.612	9.7015
UNSM 42087	Equinae	Equini	Equus	simplicidens	P4	Broadwater		Nebraska	Great Plains	Pliocene	Blancan	7.232	27.174	10.1047
UNSM 42087	Equinae	Equini	Equus	simplicidens	M1	Broadwater		Nebraska	Great Plains	Pliocene	Blancan	5.838	22.792	9.43301
UNSM 42087	Equinae	Equini	Equus	simplicidens	M2	Broadwater		Nebraska	Great Plains	Pliocene	Blancan	6.412	24.378	9.62723
UNSM 42087	Equinae	Equini	Equus	simplicidens	M3	Broadwater		Nebraska	Great Plains	Pliocene	Blancan	4.524	19.572	9.20182
UNSM 42346	Equinae	Equini	Equus	simplicidens	P2	Broadwater		Nebraska	Great Plains	Pliocene	Blancan	6.989	27.479	10.3943
UNSM 42346	Equinae	Equini	Equus	simplicidens	P3	Broadwater		Nebraska	Great Plains	Pliocene	Blancan	7.622	31.441	11.3884
UNSM 42346	Equinae	Equini	Equus	simplicidens	P4	Broadwater		Nebraska	Great Plains	Pliocene	Blancan	7.598	31.603	11.4651
UNSM 42346	Equinae	Equini	Equus	simplicidens	M1	Broadwater		Nebraska	Great Plains	Pliocene	Blancan	6.735	25.865	9.96652
UNSM 42346	Equinae	Equini	Equus	simplicidens	M2	Broadwater		Nebraska	Great Plains	Pliocene	Blancan	6.681	28.415	10.9933
UNSM 42346	Equinae	Equini	Equus	simplicidens	M3	Broadwater		Nebraska	Great Plains	Pliocene	Blancan	4.711	20.108	9.26429
UNSM 42351	Equinae	Equini	Equus	simplicidens	P2	Broadwater		Nebraska	Great Plains	Pliocene	Blancan	5.135	20.359	8.98434
UNSM 42351	Equinae	Equini	Equus	simplicidens	P3	Broadwater		Nebraska	Great Plains	Pliocene	Blancan	6.018	23.682	9.65367
UNSM 42351	Equinae	Equini	Equus	simplicidens	P4	Broadwater		Nebraska	Great Plains	Pliocene	Blancan	6.869	25.269	9.64143
UNSM 42351	Equinae	Equini	Equus	simplicidens	M1	Broadwater		Nebraska	Great Plains	Pliocene	Blancan	5.1418	21.688	9.56449
UNSM 42351	Equinae	Equini	Equus	simplicidens	M2	Broadwater		Nebraska	Great Plains	Pliocene	Blancan	5.667	27.741	11.6532
UNSM 42351	Equinae	Equini	Equus	simplicidens	M3	Broadwater		Nebraska	Great Plains	Pliocene	Blancan	4.822	20.675	9.41525
UNSM 42431	Equinae	Equini	Calippus	placidus	P3	Valentine		Nebraska	Great Plains	Miocene	Barstovian	2.037	13.86	9.71108
UNSM 42433	Equinae	Equini	Pliohippus	sp.	P3	Ash Hollow	Burge	Nebraska	Great Plains	Miocene	Clarendonian	4.58	17.916	8.3716
UNSM 42440	Equinae	Hipparionini	Neohipparion	affine	P3	Valentine		Nebraska	Great Plains	Miocene	Barstovian	2.973	21.45	12.4403
UNSM 42442	Equinae	Hipparionini			P3	Valentine	Crookston Bridge	Nebraska	Great Plains	Miocene	Barstovian	3.009	16.012	9.2307
UNSM 42447	Equinae	Hipparionini	Neohipparion	affine	P3	Valentine		Nebraska	Great Plains	Miocene	Barstovian	3.003	16.655	9.61096
UNSM 42452	Equinae	Hipparionini	Neohipparion	sp.	P3	Valentine		Nebraska	Great Plains	Miocene	Barstovian	3.895	20.915	10.5975
UNSM 42453	Equinae	Equini	Pliohippus	sp.	M2	Ash Hollow	Burge	Nebraska	Great Plains	Miocene	Clarendonian	5.217	22.147	9.69627
UNSM 42454	Equinae	Equini	Pliohippus	sp.	P3	Ash Hollow	Burge	Nebraska	Great Plains	Miocene	Clarendonian	5.779	19.094	7.94274
UNSM 42456	Equinae	Equini	Protohippus	sp.	P3	Valentine		Nebraska	Great Plains	Miocene	Barstovian	3.04	14.136	8.10755
UNSM 42468	Equinae	Hipparionini	Pseudhipparion	sp.	P3	Ash Hollow	Burge	Nebraska	Great Plains	Miocene	Clarendonian	2.795	15.288	9.1445
UNSM 4289	Equinae	Hipparionini	Neohipparion	sp.	P3	Ash Hollow		Nebraska	Great Plains	Miocene	Hemphillian	3.424	21.022	11.3608
UNSM 46810	Equinae	Equini	Equus	idahoensis	M3	Long Pine		Nebraska	Great Plains	Pliocene	Blancan	5.217	24.719	10.8223
UNSM 49318	Equinae	Equini	Equus	scotti				Nebraska	Great Plains	Pleistocene	Irv/Rancho	5.638	27.494	11.5791
UNSM 49417	Equinae	Equini	Equus	hemionus	M3			Nebraska	Great Plains	Pleistocene	Irv/Rancho	2.842	17.266	10.2419
UNSM 52296	Equinae	Hipparionini	Neohipparion	affine	P2	Ash Hollow	Cap Rock	Nebraska	Great Plains	Miocene	Clarendonian	2.332	14.908	9.76237
UNSM 52296	Equinae	Hipparionini	Neohipparion	affine	P3	Ash Hollow	Cap Rock	Nebraska	Great Plains	Miocene	Clarendonian	3.085	18.261	10.3967
UNSM 52296	Equinae	Hipparionini	Neohipparion	affine	P4	Ash Hollow	Cap Rock	Nebraska	Great Plains	Miocene	Clarendonian	3.006	19.09	11.0106
UNSM 52296	Equinae	Hipparionini	Neohipparion	affine	M1	Ash Hollow	Cap Rock	Nebraska	Great Plains	Miocene	Clarendonian	3.04	17.705	10.1545
UNSM 52296	Equinae	Hipparionini	Neohipparion	affine	M2	Ash Hollow	Cap Rock	Nebraska	Great Plains	Miocene	Clarendonian	2.812	17.524	10.4502
UNSM 52296	Equinae	Hipparionini	Neohipparion	affine	M3	Ash Hollow	Cap Rock	Nebraska	Great Plains	Miocene	Clarendonian	1.514	11.201	9.1032
UNSM 52300	Equinae	Hipparionini	Cormohipparion	occidentale	P2	Ash Hollow	Cap Rock	Nebraska	Great Plains	Miocene	Clarendonian	5.167	21.221	9.33569
UNSM 52300	Equinae	Hipparionini	Cormohipparion	occidentale	P3	Ash Hollow	Cap Rock	Nebraska	Great Plains	Miocene	Clarendonian	6.255	25.137	10.0508
UNSM 52300	Equinae	Hipparionini	Cormohipparion	occidentale	P4	Ash Hollow	Cap Rock	Nebraska	Great Plains	Miocene	Clarendonian	5.929	23.798	9.77349
UNSM 52300	Equinae	Hipparionini	Cormohipparion	occidentale	M1	Ash Hollow	Cap Rock	Nebraska	Great Plains	Miocene	Clarendonian	4.575	20.463	9.56696
UNSM 52300	Equinae	Hipparionini	Cormohipparion	occidentale	M2	Ash Hollow	Cap Rock	Nebraska	Great Plains	Miocene	Clarendonian	4.743	20.255	9.30049
UNSM 52300	Equinae	Hipparionini	Cormohipparion	occidentale	M3	Ash Hollow	Cap Rock	Nebraska	Great Plains	Miocene	Clarendonian	3.264	15.468	8.56168
UNSM 54835	Equinae	Equini	Equus	idahoensis	M1	Long Pine		Nebraska	Great Plains	Pliocene	Blancan	6.161	26.391	10.6324
UNSM 54837	Equinae	Equini	Equus	idahoensis	M1	Long Pine		Nebraska	Great Plains	Pliocene	Blancan	7.329	30.331	11.2038
UNSM 54839	Equinae	Equini	Equus	idahoensis	M3	Long Pine		Nebraska	Great Plains	Pliocene	Blancan	4.761	26.374	12.0872
UNSM 54840	Equinae	Equini	Equus	idahoensis	P2	Long Pine		Nebraska	Great Plains	Pliocene	Blancan	7.878	32.553	11.598
UNSM 56653	Equinae	Equini	Protohippus	sp.	P3	Valentine		Nebraska	Great Plains	Miocene	Barstovian	2.645	13.818	8.49635
UNSM 59261	Equinae	Equini	Calippus	sp.	P3	Ash Hollow		Nebraska	Great Plains	Miocene	Hemphillian	2.93	13.946	8.14734
UNSM 59443	Equinae	Hipparionini	Neohipparion	sp.	M2	Ash Hollow		Nebraska	Great Plains	Miocene	Clarendonian	3.157	19.855	11.1746
UNSM 5978	Equinae	Equini	Equus	excelsus	P2			Nebraska	Great Plains	Pleistocene	Irv/Rancho	7.728	27.9	10.0362
UNSM 5978	Equinae	Equini	Equus	excelsus	P3			Nebraska	Great Plains	Pleistocene	Irv/Rancho	7.781	30.751	11.0241
UNSM 5978	Equinae	Equini	Equus	excelsus	P4			Nebraska	Great Plains	Pleistocene	Irv/Rancho	7.892	30.884	10.9936
UNSM 5978	Equinae	Equini	Equus	excelsus	M1			Nebraska	Great Plains	Pleistocene	Irv/Rancho	6.064	26.187	10.6342
UNSM 5978	Equinae	Equini	Equus	excelsus	M2			Nebraska	Great Plains	Pleistocene	Irv/Rancho	5.807	26.597	11.0371
UNSM 6023	Equinae	Equini	Equus	semiplicatus	P3			Nebraska	Great Plains	Pleistocene	Irv/Rancho	5.329	21.044	9.11602
UNSM 6023	Equinae	Equini	Equus	semiplicatus	P4			Nebraska	Great Plains	Pleistocene	Irv/Rancho	5.508	21.446	9.13796
UNSM 6023	Equinae	Equini	Equus	semiplicatus	M1			Nebraska	Great Plains	Pleistocene	Irv/Rancho	4.823	20.698	9.42475
UNSM 6023	Equinae	Equini	Equus	semiplicatus	M2			Nebraska	Great Plains	Pleistocene	Irv/Rancho	4.616	19.858	9.24278
UNSM 6023	Equinae	Equini	Equus	semiplicatus	M3			Nebraska	Great Plains	Pleistocene	Irv/Rancho	4.015	18.958	9.46128
UNSM 6027	Equinae	Equini	Equus	fraternus	P4			Nebraska	Great Plains	Pleistocene	Irv/Rancho	8.711	31.912	10.8123
UNSM 6027	Equinae	Equini	Equus	fraternus	M1			Nebraska	Great Plains	Pleistocene	Irv/Rancho	5.943	26.152	10.7276
UNSM 6027	Equinae	Equini	Equus	fraternus	M2			Nebraska	Great Plains	Pleistocene	Irv/Rancho	6.511	25.838	10.1259
UNSM 6027	Equinae	Equini	Equus	fraternus	M3			Nebraska	Great Plains	Pleistocene	Irv/Rancho	5.781	25.099	10.4389
UNSM 62895	Equinae	Equini	Equus	idahoensis	M2	Long Pine		Nebraska	Great Plains	Pliocene	Blancan	5.457	27.43	11.7422
UNSM 84000	Equinae	Hipparionini	Neohipparion	republicanus	P3	Valentine		Nebraska	Great Plains	Miocene	Barstovian	3.032	18.813	10.8042
UNSM 8515	Equinae	Equini	Protohippus	perditus	P3	Valentine		Nebraska	Great Plains	Miocene	Barstovian	3.22	16.105	8.97497
UNSM 8633	Equinae	Hipparionini	Neohipparion	sp.	P3	Ash Hollow		Nebraska	Great Plains	Miocene	Clarendonian	4.631	21.703	10.0852
UNSM 90576	Anchitheriinae	"Anchitheriini"	Parahippus	cognatus	P3	Valentine		Nebraska	Great Plains	Miocene	Barstovian	2.874	14.401	8.49472
UNSM 90641	Equinae	Equini	Protohippus	sp.	P3	Ash Hollow		Nebraska	Great Plains	Miocene	Hemphillian	4.556	17.874	8.37394
UNSM 94445	Equinae	Equini	Pliohippus	noblis		Ash Hollow		Nebraska	Great Plains	Miocene	Hemphillian	5.461	21.227	9.08349
UNSM 96997	Equinae	Hipparionini	Cormohipparion	occidentale	P3	Valentine		Nebraska	Great Plains	Miocene	Barstovian	3.351	19.123	10.4465
UNSM 96999	Equinae	Hipparionini	Pseudhipparion	sp.	P3	Valentine		Nebraska	Great Plains	Miocene	Barstovian	3.3048	16.548	9.10276
UNSM 9798	Equinae	Equini	Protohippus	perditus	P3	Valentine		Nebraska	Great Plains	Miocene	Barstovian	3.308	14.611	8.03336
UNSM 9800	Equinae	Equini	Protohippus	perditus	M2	Valentine		Nebraska	Great Plains	Miocene	Barstovian	3.294	17.569	9.68022
UNSM 98405	Equinae	Equini	Pliohippus	mirabilis	M1	Valentine		Nebraska	Great Plains	Miocene	Barstovian	4.047	19.148	9.51824
UNSM 98406	Equinae	Equini	Pliohippus	mirabilis	M1	Valentine		Nebraska	Great Plains	Miocene	Barstovian	3.912	21.466	10.853
UOMNCH B-4028	Equinae	Equini	Equus	caballus	P2					Recent	Recent	8.465	27.161	9.33539
UOMNCH B-4028	Equinae	Equini	Equus	caballus	P3					Recent	Recent	9.055	30.412	10.1065
UOMNCH B-4028	Equinae	Equini	Equus	caballus	P4					Recent	Recent	10.14	31.826	9.99455
UOMNCH B-4028	Equinae	Equini	Equus	caballus	M1					Recent	Recent	8.101	27.276	9.58322
UOMNCH B-4028	Equinae	Equini	Equus	caballus	M2					Recent	Recent	7.386	27.331	10.0566
UOMNCH B-4028	Equinae	Equini	Equus	caballus	M3					Recent	Recent	5.458	24.13	10.3286
UOMNCH B-8698	Equinae	Equini	Equus	caballus	P2					Recent	Recent	7.816	25.708	9.19551
UOMNCH B-8698	Equinae	Equini	Equus	caballus	P3					Recent	Recent	8.367	30.399	10.5093
UOMNCH B-8698	Equinae	Equini	Equus	caballus	P4					Recent	Recent	8.798	30.154	10.1661
UOMNCH B-8698	Equinae	Equini	Equus	caballus	M1					Recent	Recent	7.844	24.385	8.70671
UOMNCH B-8698	Equinae	Equini	Equus	caballus	M2					Recent	Recent	6.738	22.629	8.71766
UOMNCH B-8698	Equinae	Equini	Equus	caballus	M3					Recent	Recent	5.56	20.289	8.60445
UOMNCH B-8700	Equinae	Equini	Equus	caballus	P2					Recent	Recent	7.057	24.985	9.40523
UOMNCH B-8700	Equinae	Equini	Equus	caballus	P3					Recent	Recent	7.362	27.931	10.2941
UOMNCH B-8700	Equinae	Equini	Equus	caballus	P4					Recent	Recent	7.184	26.809	10.0022
UOMNCH B-8700	Equinae	Equini	Equus	caballus	M1					Recent	Recent	6.234	23.325	9.34197
UOMNCH B-8700	Equinae	Equini	Equus	caballus	M2					Recent	Recent	6.488	23.265	9.13372
UOMNCH B-8700	Equinae	Equini	Equus	caballus	M3					Recent	Recent	5.781	25.048	10.4177
UOMNCH B-9092	Equinae	Equini	Equus	caballus	P2					Recent	Recent	4.427	19.043	9.05067
UOMNCH B-9092	Equinae	Equini	Equus	caballus	P3					Recent	Recent	5.298	21.686	9.42157
UOMNCH B-9092	Equinae	Equini	Equus	caballus	P4					Recent	Recent	4.834	21.042	9.57048
UOMNCH B-9092	Equinae	Equini	Equus	caballus	M1					Recent	Recent	4.25	19.849	9.62818
UOMNCH B-9092	Equinae	Equini	Equus	caballus	M2					Recent	Recent	4.509	20.263	9.54253
UOMNCH B-9092	Equinae	Equini	Equus	caballus	M3					Recent	Recent	4.667	19.273	8.92135
UOMNCH F-21828	Equinae	Equini	Equus	sp.		Fossil Lake		Oregon	Columbia Plateau	Pleistocene	Irv/Rancho	6.654	29.935	11.6048
USNM 10314	Equinae	Equini	Equus	sp.	P3	Dragon Mountains		Arizona	Great Basin	Pleistocene	Irv/Rancho	4.689	24.944	11.5193
USNM 10482	Equinae	Equini	Equus	"nevadanus"	P3	Gravel		Nevada	Great Basin	Pleistocene	Irv/Rancho	4.676	21.491	9.93847
USNM 10571	Equinae	Equini	Equus	leidyi		Tampa Bay		Florida	Gulf Coast	Pleistocene	Irv/Rancho	4.755	24.37	11.1758
USNM 10622	Equinae	Equini	Equus	leidyi	M3	Tampa Bay		Florida	Gulf Coast	Pleistocene	Irv/Rancho	6.013	30.443	12.4149
USNM 11160	Equinae	Equini	Equus	lambei	P3	Hunker Creek		Yukon	Polar	Pleistocene	Irv/Rancho	8.166	31.124	10.8916
USNM 11190	Equinae	Equini	Equus	leidyi		Melbourne		Florida	Gulf Coast	Pleistocene	Irv/Rancho	4.803	27.49	12.5435
USNM 11192	Equinae	Equini	Equus	fraternus	P2	Melbourne		Florida	Gulf Coast	Pleistocene	Irv/Rancho	4.534	23.657	11.1101
USNM 11200	Equinae	Equini	Equus	leidyi		Melbourne		Florida	Gulf Coast	Pleistocene	Irv/Rancho	5.269	27.303	11.8945
USNM 11351	Equinae	Equini	Equus	scotti		Sulpher Springs Valley		Arizona	Great Basin	Pleistocene	Irv/Rancho	5.808	28.364	11.7694
USNM 11372	Equinae	Equini	Equus	complicatus				Texas	Great Plains	Pleistocene	Irv/Rancho	6.901	32.304	12.297
USNM 11374	Equinae	Equini	Equus	complicatus	M3			Texas	Great Plains	Pleistocene	Irv/Rancho	4.64	22.998	10.6766
USNM 11412	Equinae	Equini	Equus	leidyi	M3			Florida	Gulf Coast	Pleistocene	Irv/Rancho	4.542	23.409	10.984
USNM 11623	Equinae	Equini	Equus	complicatus				Florida	Gulf Coast	Pleistocene	Irv/Rancho	6.733	32.206	12.4117
USNM 11658	Equinae	Equini	Equus	sp.	P3			Alaska	Polar	Pleistocene	Irv/Rancho	8.588	30.996	10.5769
USNM 1172	Equinae	Equini	Equus	sp.		Phosphate Bed		South Carolina	Eastern US	Pleistocene	Irv/Rancho	6.265	28.325	11.3164
USNM 11745	Equinae	Hipparionini	Nannippus	phlegon		San Pedro Valley		Arizona	Great Basin	Pliocene	Blancan	2.182	16.801	11.3739
USNM 11746	Equinae	Hipparionini	Hipparion	sp.		San Pedro Valley		Arizona	Great Basin	Pliocene	Blancan	1.968	15.632	11.143
USNM 11819	Equinae	Equini	Equus	leidyi		Savannah		Georgia	Eastern US	Pleistocene	Irv/Rancho	6.98	30.435	11.5198
USNM 11986	Equinae	Equini	Equus	simplicidens	P3	Glenns Ferry		Idaho	Columbia Plateau	Pliocene	Blancan	7.926	24.138	8.57382
USNM 12146	Equinae	Equini	Equus	lambei	P3	Sullivan Creek		Alaska	Polar	Pleistocene	Irv/Rancho	7.817	35.388	12.6572
USNM 12804	Equinae	Equini	Equus	lambei	P3	Skull Cliff		Alaska	Polar	Pleistocene	Irv/Rancho	7.112	31.443	11.7904
USNM 12875	Equinae	Equini	Equus	sp.		San Pedro Valley		Arizona	Great Basin	Pliocene	Blancan	5.492	23.785	10.1493
USNM 13682	Equinae	Equini	Equus	sp.		Lake Chetek		Minnesota	Great Plains	Pleistocene	Irv/Rancho	7.314	28.413	10.5061
USNM 14417	Equinae	Equini	Equus	sp.	P3	Twin Falls		Idaho	Columbia Plateau	Pleistocene	Irv/Rancho	6.978	26.763	10.1314
USNM 15219	Equinae	Equini	Equus	leidyi		Lake Okechobee		Florida	Gulf Coast	Pleistocene	Irv/Rancho	4.91	27.014	12.1912
USNM 15389	Equinae	Equini	Equus	sp.				Mexico	Gulf Coast	Pleistocene	Irv/Rancho	6.19	25.455	10.2312
USNM 17082	Equinae	Equini	Equus	sp.	P2			Maryland	Eastern US	Pleistocene	Irv/Rancho	6.385	25.397	10.0508
USNM 171045	Equinae	Hipparionini	Cormohipparion	emsliei		Maurilla		Alabama	Eastern US	Miocene	Hemphillian	3.956	22.812	11.4693
USNM 173623	Equinae	Hipparionini	Neohipparion	eurystyle	P3	Maurilla		Alabama	Eastern US	Miocene	Hemphillian	4.127	24.06	11.8435
USNM 17922	Equinae	Equini	Equus	sp.	M3	Cave		Virginia	Eastern US	Pleistocene	Irv/Rancho	4.67	23.62	10.93
USNM 18205	Equinae	Equini	Equus	sp.		Bone Valley		Florida	Gulf Coast	Miocene	Hemphillian	6.435	29.224	11.5203
USNM 18206	Equinae	Hipparionini	Nannippus	minor	M3	Bone Valley		Florida	Gulf Coast	Miocene	Hemphillian	1.374	11.705	9.98569
USNM 18207	Equinae	Hipparionini	Nannippus	minor	P2	Bone Valley		Florida	Gulf Coast	Miocene	Hemphillian	1.378	10.223	8.70871
USNM 18208	Equinae	Hipparionini	Nannippus	minor		Bone Valley		Florida	Gulf Coast	Miocene	Hemphillian	1.983	9.304	6.60706
USNM 18212	Equinae	Hipparionini	Neohipparion	phosphorum	M3	Bone Valley		Florida	Gulf Coast	Miocene	Hemphillian	2.931	18.765	10.9608
USNM 182197	Equinae	Hipparionini	Nannippus	sp.		Lee Creek		North Carolina	Eastern US	Miocene	Hemphillian	2.413	15.618	10.0542
USNM 18234	Equinae	Hipparionini	Nannippus	minor	P2	Bone Valley		Florida	Gulf Coast	Miocene	Hemphillian	1.687	14.003	10.7811
USNM 18236	Equinae	Hipparionini	Nannippus	minor		Bone Valley		Florida	Gulf Coast	Miocene	Hemphillian	1.82	13.991	10.3708
USNM 18243	Equinae	Hipparionini	Nannippus	minor		Bone Valley		Florida	Gulf Coast	Miocene	Hemphillian	1.601	14.354	11.3443
USNM 18244	Equinae	Hipparionini	Nannippus	minor		Bone Valley		Florida	Gulf Coast	Miocene	Hemphillian	1.74	16.787	12.7262
USNM 18250	Equinae	Hipparionini	Neohipparion	phosphorum		Bone Valley		Florida	Gulf Coast	Miocene	Hemphillian	3.314	20.943	11.5044
USNM 187652	Equinae	Equini	Equus	sp.				Florida	Gulf Coast	Pleistocene	Irv/Rancho	4.321	24.762	11.9122
USNM 1907	Equinae	Equini	Equus	complicatus		Lander's Mill		Mississippi	Gulf Coast	Pleistocene	Irv/Rancho	6.005	34.736	14.175
USNM 1932	Equinae	Equini	Protohippus	fossulatus	M2	Loup Fork		Texas	Great Plains	Miocene	Hemphillian	6.639	21.733	8.43467
USNM 1933	Equinae	Equini	Protohippus	mirabilis	P3	Loup Fork		Texas	Great Plains	Miocene	Hemphillian	6.244	17.594	7.04098
USNM 20105	Equinae	Hipparionini	Neohipparion	phosphorum		Bone Valley		Florida	Gulf Coast	Miocene	Hemphillian	2.927	20.361	11.9011
USNM 23892	Equinae	Hipparionini	Hipparion	forcei		Santa Margarita SS		California	California	Miocene	Clarendonian	2.968	19.233	11.1639
USNM 23903	Equinae	Equini	Equus	simplicidens	P3	Glenns Ferry		Idaho	Columbia Plateau	Pliocene	Blancan	9.704	30.219	9.70074
USNM 244299	Equinae	Hipparionini	Neohipparion	sp.		Valentine		Nebraska	Great Plains	Miocene	Barstovian	3.958	21.166	10.639
USNM 25142	Anchitheriinae	"Anchitheriini"	Archaeohippus	minimus	P3	Madison Valley		Montana	Great Plains	Miocene	Barstovian	1.302	9.409	8.2459
USNM 25583	Equinae	Equini	Equus	littoralis		Melbourne		Florida	Gulf Coast	Pleistocene	Irv/Rancho	3.943	21.335	10.7443
USNM 25683	Equinae	Equini	Equus	sp.		Pearl River		Mississippi	Gulf Coast	Pleistocene	Irv/Rancho	5.133	24.286	10.7194
USNM 2572	Equinae	Hipparionini	Hippotherium	sp.	P3	Tesuque		New Mexico	Great Basin	Miocene	Barstovian	4.17	21.958	10.7529
USNM 2573	Equinae	"Merychippini"	Merychippus	sp.	M2	Pawnee Creek		New Mexico	Great Basin	Miocene	Barstovian	2.336	16.456	10.7668
USNM 262545	Equinae	Equini	Equus	sp.	P3	Lost Chicken Creek		Alaska	Polar	Pleistocene	Irv/Rancho	6.947	27.203	10.3209
USNM 26324	Equinae	Equini	Equus	complicatus		Brunswick		Georgia	Eastern US	Pleistocene	Irv/Rancho	4.636	24.602	11.4261
USNM 299566	Equinae	Hipparionini	Cormohipparion	sp.		Parker Creek		Maryland	Eastern US	Miocene	Clarendonian	2.713	19.747	11.9888
USNM 3292	Equinae	Hipparionini	Hipparion	plicatile				Florida	Gulf Coast		Irv/Rancho	3.34	22.075	12.0789
USNM 330994	Equinae	Equini	Protohippus	gidleyi	P2	Maurilla		Alabama	Eastern US	Miocene	Hemphillian	3.724	16.33	8.46216
USNM 351924	Anchitheriinae	"Anchitheriini"	Megahippus	mckennai	P4	Valentine		Nebraska	Great Plains	Miocene	Barstovian	6.87	17.952	6.84912
USNM 390722	Equinae	Hipparionini	Cormohipparion	emsliei		Maurilla		Alabama	Eastern US	Miocene	Hemphillian	3.043	19.763	11.3293
USNM 391594	Equinae	Equini	Protohippus	gidleyi		Maurilla		Alabama	Eastern US	Miocene	Hemphillian	3.442	17.956	9.67841
USNM 391852	Equinae	Hipparionini	Nannippus	phlegon		Neuse River		North Carolina	Eastern US	Pliocene	Blancan	2.405	16.402	10.5764
USNM 391854	Equinae	Hipparionini	Nannippus	phlegon		Neuse River		North Carolina	Eastern US	Pliocene	Blancan	1.743	14.294	10.8269
USNM 391855	Equinae	Hipparionini	Nannippus	phlegon		Neuse River		North Carolina	Eastern US	Pliocene	Blancan	2.673	17.695	10.8231
USNM 391856	Equinae	Hipparionini	Nannippus	phlegon		Neuse River		North Carolina	Eastern US	Pliocene	Blancan	1.783	15.32	11.4732
USNM 391864	Equinae	Hipparionini	Nannippus	phlegon		Neuse River		North Carolina	Eastern US	Pliocene	Blancan	1.999	13.835	9.78527
USNM 391865	Equinae	Hipparionini	Nannippus	phlegon	M3	Neuse River		North Carolina	Eastern US	Pliocene	Blancan	1.6	12.426	9.82362
USNM 413207	Equinae	Hipparionini	Hipparion	sp.	M3			Virginia	Eastern US	Miocene	Hemphillian	2.887	19.11	11.247
USNM 413212	Equinae	Hipparionini	Hipparion	sp.				Texas	Great Plains	Miocene	Hemphillian	2.235	14.183	9.48701
USNM 413671	Equinae	"Merychippini"	Merychippus	sp.	M2	Willow Grove		Nevada	Great Basin	Miocene	Barstovian	5.867	20.777	8.57778
USNM 416338/UF 17570	Equinae	Hipparionini	Nannippus	minor	P3	Bone Valley		Florida	Gulf Coast	Miocene	Hemphillian	2.109	14.72	10.1361
USNM 420682	Equinae	Hipparionini	Nannippus	gratus	P2	Clarendon		Texas	Great Plains	Miocene	Clarendonian	2.474	14.787	9.40113
USNM 4999	Equinae	Equini	Equus	scotti	P3	Hay Spring		Nebraska	Great Plains	Pleistocene	Irv/Rancho	5.553	27.559	11.695
USNM 520	Equinae	Equini	Equus	leidyi				Tennessee	Eastern US	Pleistocene	Irv/Rancho	4.348	23.763	11.3961
USNM 521290	Equinae	Equini	Protohippus	gidleyi		Maurilla		Alabama	Eastern US	Miocene	Hemphillian	4.537	21.855	10.2605
USNM 540677	Equinae	Equini	Equus	sp.	M3	El Hatillo		Panama	Gulf Coast	Pleistocene	Irv/Rancho	4.314	19.901	9.58153
USNM 5446	Equinae	Hipparionini	Pseudhipparion	gratum	M3			Nebraska	Great Plains	Miocene	Clarendonian	1.477	11.107	9.13917
USNM 5447	Equinae	Hipparionini	Pseudhipparion	gratum				Nebraska	Great Plains	Miocene	Clarendonian	2.169	16.088	10.9238
USNM 555	Equinae	Equini	Equus	sp.				Massachusetts	Eastern US	Pleistocene	Irv/Rancho	7.905	31.311	11.1364
USNM 557	Equinae	Equini	Equus	pacificus	P3	Summer Lake		Oregon	Columbia Plateau	Pleistocene	Irv/Rancho	9.331	30.913	10.1199
USNM 569	Equinae	Equini	Pliohippus	mirabilis		Valentine		Nebraska	Great Plains	Miocene	Barstovian	3.793	18.338	9.41587
USNM 573	Anchitheriinae	"Anchitheriini"	Hypohippus	affinis		Valentine		Nebraska	Great Plains	Miocene	Barstovian	4.779	18.253	8.3496
USNM 584	Equinae	Hipparionini	Hipparion	affine				Nebraska	Great Plains	Miocene	Clarendonian	3.652	21.514	11.2579
USNM 587	Equinae	Hipparionini	Pseudhipparion	gratum				Nebraska	Great Plains	Miocene	Clarendonian	2.704	18.996	11.552
USNM 619	Equinae	Equini	Protohippus	perditus	M2	Valentine		Nebraska	Great Plains	Miocene	Barstovian	3.364	17.823	9.71746
USNM 667	Equinae	Equini	Equus	excelsus	M2	Platte River Gravel		Nebraska	Great Plains	Pleistocene	Irv/Rancho	5.469	23.23	9.93334
USNM 7084	Equinae	Equini	Equus	complicatus		Avery Island		Louisiana	Gulf Coast	Pleistocene	Irv/Rancho	5.72	29.615	12.3827
USNM 726	Equinae	Equini	Equus	complicatus	P2	Avery Island		Louisiana	Gulf Coast	Pleistocene	Irv/Rancho	8.442	31.737	10.923
USNM 7507	Equinae	Equini	Protohippus	placidus	P3	Ogallala		Kansas	Great Plains	Miocene	Hemphillian	3.851	18.801	9.58063
USNM 7514	Equinae	Hipparionini	Cormohipparion	sp.		Ogallala		Kansas	Great Plains	Miocene	Hemphillian	4.013	26.216	13.0868
USNM 7530	Equinae	Hipparionini	Neohipparion	affine		Ogallala		Kansas	Great Plains	Miocene	Hemphillian	4.778	22.604	10.341
USNM 7700	Equinae	Equini	Equus	scotti	P3	Yukon River		Alaska	Polar	Pleistocene	Irv/Rancho	6.281	26.964	10.759
USNM 7868	Equinae	Equini	Equus	hatcheri	P3	Hay Springs		Nebraska	Great Plains	Pleistocene	Irv/Rancho	9.62	32.958	10.6261
USNM 7935	Equinae	Equini	Equus	scotti				West Virginia	Eastern US	Pleistocene	Irv/Rancho	5.647	27.879	11.7319
USNM 8265	Equinae	Hipparionini	Hipparion	plicatile	M2	Bone Valley		Florida	Gulf Coast	Miocene	Hemphillian	4.561	24.063	11.2673
USNM 8268	Equinae	Equini	Equus	sp.		Palmetto		Florida	Gulf Coast	Pleistocene	Irv/Rancho	7.125	30.659	11.4859
USNM 8426	Equinae	Equini	Equus	lambei	P3			Yukon	Polar	Pleistocene	Irv/Rancho	6.783	23.639	9.0765
USNM 8642	Equinae	Equini	Equus	holmesi	P3	Sulpher Spring		Oklahoma	Great Plains	Pleistocene	Irv/Rancho	7.816	29.251	10.4628
USNM 876	Equinae	Equini	Equus	scotti				Ohio	Eastern US	Pleistocene	Irv/Rancho	6.996	32.143	12.1524
USNM 8813	Equinae	Equini	Equus	sp.				Massachusetts	Eastern US	Pleistocene	Irv/Rancho	7.27	30.109	11.1668
USNM 882	Equinae	Equini	Equus	fraternus				Massachusetts	Eastern US	Pleistocene	Irv/Rancho	5.155	25.301	11.1435
USNM 8945	Equinae	Equini	Equus	leidyi				Tennessee	Eastern US	Pleistocene	Irv/Rancho	4.931	23.046	10.3783
USNM 9464	Equinae	Equini	Equus	pacificus				Iowa	Great Plains	Pleistocene	Irv/Rancho	8.203	29.532	10.3111
UWBM 17938	Equinae	"Merychippini"	Merychippus	sp.		Virgin Valley		Nevada	Columbia Plateau	Miocene	Barstovian	2.882	18.289	10.7732
UWBM 19200	Equinae	Equini	Equus	lambei				Alaska	Polar	Pleistocene	Irv/Rancho	11.58	41.886	12.3088
UWBM 19201	Equinae	Equini	Equus	lambei				Alaska	Polar	Pleistocene	Irv/Rancho	13.691	44.684	12.0763
UWBM 19202	Equinae	Equini	Equus	lambei				Alaska	Polar	Pleistocene	Irv/Rancho	8.364	32.009	11.0679
UWBM 19203	Equinae	Equini	Equus	lambei				Alaska	Polar	Pleistocene	Irv/Rancho	11.159	38.905	11.6464
UWBM 22278	Equinae	Equini	Equus	simplicidens	P2	Tehama		California	California	Pliocene	Blancan	7.424	23.709	8.7015
UWBM 22296	Equinae	Equini	Equus	simplicidens		Tehama		California	California	Pliocene	Blancan	7.71	24.128	8.68949
UWBM 22297	Equinae	Equini	Equus	simplicidens	M2	Tehama		California	California	Pliocene	Blancan	6.723	24.19	9.32941
UWBM 22298	Equinae	Equini	Equus	simplicidens		Tehama		California	California	Pliocene	Blancan	6.247	23.428	9.37345
UWBM 22299	Equinae	Equini	Equus	simplicidens	P3	Tehama		California	California	Pliocene	Blancan	7.31	25.304	9.35902
UWBM 22300	Equinae	Equini	Equus	simplicidens	P4	Tehama		California	California	Pliocene	Blancan	7.066	24.902	9.36801
UWBM 28027	Equinae	Equini	Equus	sp.				Texas	Great Plains	Pleistocene	Irv/Rancho	6.529	25.526	9.98986
UWBM 28027	Equinae	Equini	Equus	sp.				Texas	Great Plains	Pleistocene	Irv/Rancho	6.219	26.252	10.5269
UWBM 40927	Anchitheriinae	"Anchitheriini"	Desmatippus	sp.		Mascall		Oregon	Columbia Plateau	Miocene	Barstovian	2.936	15.508	9.05061
UWBM 40927	Anchitheriinae	"Anchitheriini"	Desmatippus	sp.		Mascall		Oregon	Columbia Plateau	Miocene	Barstovian	2.433	14.235	9.12613
UWBM 42136	Equinae	Equini	Equus	simplicedens		Ringold		Washington	Columbia Plateau	Pliocene	Blancan	7.239	27.111	10.0764
UWBM 42323	Equinae	Equini	Equus	simplicedens	M3	Ringold		Washington	Columbia Plateau	Pliocene	Blancan	6.024	22.834	9.30335
UWBM 42331	Equinae	Equini	Equus	simplicedens		Ringold		Washington	Columbia Plateau	Pliocene	Blancan	6.575	24.067	9.38586
UWBM 45033	Equinae	Equini	Equus	simplicedens	M1	Ringold		Washington	Columbia Plateau	Pliocene	Blancan	5.405	21.273	9.15021
UWBM 45033	Equinae	Equini	Equus	simplicedens	M2	Ringold		Washington	Columbia Plateau	Pliocene	Blancan	6.178	22.001	8.85153
UWBM 45033	Equinae	Equini	Equus	simplicedens	M3	Ringold		Washington	Columbia Plateau	Pliocene	Blancan	5.873	23.006	9.49317
UWBM 45102	Equinae	Equini	Equus	simplicedens		Ringold		Washington	Columbia Plateau	Pliocene	Blancan	8.604	29.27	9.97867
UWBM 48724	Equinae	Hipparionini	Hipparion	sp.		Shutler		Oregon	Columbia Plateau	Miocene	Hemphillian	4.828	25.305	11.5166
UWBM 50008	Equinae	Equini	Equus	sp.	M3			Alaska	Polar	Pleistocene	Irv/Rancho	7.57	27.424	9.96742
UWBM 50008	Equinae	Equini	Equus	sp.	M3			Alaska	Polar	Pleistocene	Irv/Rancho	8.153	28.723	10.0594
UWBM 58727	Equinae	Equini	Equus	simplicedens		Glenns Ferry		Idaho	Columbia Plateau	Pliocene	Blancan	6.423	20.238	7.98544
UWBM 58727	Equinae	Equini	Equus	simplicedens	P3	Glenns Ferry		Idaho	Columbia Plateau	Pliocene	Blancan	7.582	24.732	8.98188
UWBM 58727	Equinae	Equini	Equus	simplicedens	M1	Glenns Ferry		Idaho	Columbia Plateau	Pliocene	Blancan	7.246	24.758	9.19743
UWBM 58727	Equinae	Equini	Equus	simplicedens	M2	Glenns Ferry		Idaho	Columbia Plateau	Pliocene	Blancan	8.452	25.832	8.88543
UWBM 58727	Equinae	Equini	Equus	simplicedens	M3	Glenns Ferry		Idaho	Columbia Plateau	Pliocene	Blancan	7.615	26.954	9.76761
UWBM 59241	Equinae	Hipparionini	Nannippus	sp.	P3	Dalles Group		Oregon	Columbia Plateau	Miocene	Hemphillian	2.134	11.866	8.12283
UWBM 59241	Equinae	Hipparionini	Nannippus	sp.	P4	Dalles Group		Oregon	Columbia Plateau	Miocene	Hemphillian	2.407	10.314	6.64797
UWBM 59241	Equinae	Hipparionini	Nannippus	sp.	M2	Dalles Group		Oregon	Columbia Plateau	Miocene	Hemphillian	1.804	11.847	8.82044
UWBM 59241	Equinae	Hipparionini	Nannippus	sp.	M3	Dalles Group		Oregon	Columbia Plateau	Miocene	Hemphillian	2.072	13.339	9.26677
UWBM 61573	Equinae	Hipparionini	Nannippus	sp.	P2	McKay		Oregon	Columbia Plateau	Miocene	Hemphillian	4.927	25.024	11.2737
UWBM 71401	Equinae	"Merychippini"	Merychippus	sp.		Flint Creek		Montana	Great Plains	Miocene	Barstovian	2.907	16.794	9.8499
UWBM 71401	Equinae	"Merychippini"	Merychippus	sp.		Flint Creek		Montana	Great Plains	Miocene	Barstovian	2.778	14.755	8.85265
UWBM 75621	Equinae	Equini	Equus	sp.		Fossil Lake		Oregon	Columbia Plateau	Pleistocene	Irv/Rancho	11.445	34.799	10.2863
UWBM 80705	Equinae	Equini	Equus	simplicedens		Ringold		Washington	Columbia Plateau	Pliocene	Blancan	7.642	27.365	9.89901
UWBM 87138	Equinae	Equini	Equus	sp.	P4			Alaska	Polar	Pleistocene	Irv/Rancho	8.836	30.716	10.3332
UWBM 87138	Equinae	Equini	Equus	sp.	M2			Alaska	Polar	Pleistocene	Irv/Rancho	7.029	27.93	10.5347
UWBM 87138	Equinae	Equini	Equus	sp.	M3			Alaska	Polar	Pleistocene	Irv/Rancho	7.219	30.635	11.402
